1 **STAT3-mediated allelic imbalance of novel genetic variant**  
2 **rs1047643 and B cell specific super-enhancer in association**  
3 **with systemic lupus erythematosus**

4 Yanfeng Zhang<sup>1\*</sup>, Kenneth Day<sup>2</sup>, Devin M. Absher<sup>1\*</sup>

5 1. HudsonAlpha Institute for Biotechnology, Huntsville, AL 35806 USA

6 2. Zymo Research Corp, Irvine, CA 92614 USA

7 \* Correspondence may be addressed to: Yanfeng Zhang

8 (yanfengzhang1984@outlook.com) or Devin M. Absher (dabsher@hudsonalpha.org).

9

10 **Abstract**

11 Mapping of allelic imbalance (AI) at heterozygous loci has the potential to establish  
12 links between genetic risk for disease and biological function. Leveraging  
13 multi-omics data for AI analysis and functional annotation, we discovered a novel  
14 functional risk variant rs1047643 at 8p23 in association with SLE. This variant  
15 displays dynamic AI of chromatin accessibility and allelic expression on *FDFT1* gene  
16 in B cells with SLE. We further found a B-cell restricted super-enhancer (SE) that  
17 physically contacts with this SNP-residing locus, an interaction that also appears  
18 specifically in B cells. Quantitative analysis of open chromatin and DNA methylation  
19 profiles further demonstrated that the SE exhibits aberrant activity in B cell  
20 development with SLE. Functional studies identified that STAT3, a master factor  
21 associated with autoimmune diseases, directly regulates both the AI of risk variant  
22 and the activity of SE in cultured B cells. Our study reveals that STAT3-mediated SE  
23 activity and cis-regulatory effects of SNP rs1047643 at 8p23 locus are associated with  
24 B cell deregulation in SLE.

25

## 26 **Introduction**

27 Super-enhancers (SEs) are recently discovered large domains of clustered enhancers  
28 (1, 2). The extraordinary feature of SEs is the extremely high and broad enrichment of  
29 enhancer-related transcription factors (TFs), H3K4me1 and H3K27ac modifications,  
30 resulting in high capability to enhance gene expression programs (2). A large quantity  
31 of SEs show cell/tissue specificity (3), thereby they have become principal  
32 determinants of cell identity (4). Nonetheless, disease-associated SEs, in particular  
33 those exhibiting aberrant activity in autoimmune diseases, are less characterized.

34  
35 Signal transducer and activator of transcription 3 (STAT3), as one of seven STAT  
36 family members, is activated by phosphorylation at tyrosine 705 (Y705) and/or at  
37 serine 727 (S727) (5). After import to the nucleus, the phospho-STAT3 (pSTAT3)  
38 modulates gene transcription by binding its target sequence (6). STAT3 has gained  
39 broad attention because it plays a key role in a variety of pathophysiological immune  
40 responses related to lymphocyte development and differentiation, and in other cellular  
41 processes of normal and tumor cells (7).

42  
43 Systemic lupus erythematosus (SLE) is an autoimmune disease that is known to be  
44 associated with an array of abnormal immune cell signaling. B-cell hyperactivity in  
45 auto-antigen recognition and interaction with T-cells, which ultimately results in  
46 multi-organ damage, is central to the pathogenesis of SLE (8). Genetic factors  
47 conferring a predisposition to the development of SLE have been widely

48 characterized. Over 100 loci have been implicated in SLE by genome-wide  
49 association studies (GWAS) (9, 10). Among them, several genes and/or loci are  
50 potent as putative drivers of the disease. For example, genetic risk variants at the  
51 promoter of *BLK* at 8p23 locus alter *BLK* transcription activity and thus contribute to  
52 autoreactive B-cell responses (11). Nonetheless, the GWAS-identified genetic  
53 variants together explained approximately 30% of the heritability of SLE (12, 13),  
54 suggesting a requirement of further efforts to explain the missing heritability of SLE.  
55 Meanwhile, there is growing evidence that genetic risk factors behave in a  
56 context-dependent or cell-specific manner (11, 14). Thus, for SLE and other  
57 autoimmune diseases, there is a need to identify the regulatory programs in which  
58 these genetic factors impact the immune cell developmental processes.

59

60 One approach for tying genetic risk to function in the post-GWAS era (14), is a  
61 measurement of allelic imbalance (AI) on two alleles at a given heterozygous locus,  
62 typically at single nucleotide polymorphism (SNP). The genes and/or loci with SNPs  
63 exhibiting AI could provide a strong foundation for implicating the genetic or  
64 epigenetic mechanisms linked to complex traits or diseases (15, 16). As a readout of  
65 AI, analyses of allele-specific chromatin accessibility and allele-specific RNA  
66 expression have accumulated a wealth of interesting findings, including functional  
67 cis-regulation (17, 18), genomic imprinting (19), X-chromosome inactivation or  
68 escape (20). Therefore, tracking AI difference in a comparison between diseases and  
69 controls may enable to uncover novel functional variants associated with complex



70 diseases. In this study, we describe one such strategy through integrative multi-omics  
71 analysis to discover known or novel functional variants associated with SLE, and  
72 report on the identification of a novel risk variant rs1047643 and B cell specific SE in  
73 B cells with SLE. We further demonstrate that the resultant allelic imbalanced variant  
74 and SE activity are directly controlled by STAT3, a master TF that plays a critical  
75 role in B cell development and highly associates with autoimmune diseases.

76

77

## 78 **Material and methods**

### 79 **Reagents and Antibodies**

80 ML115 (Cayman Chemical); S3I-201 (SML0330, Sigma); Phospho-STAT3 (Ser727)  
81 antibody (Cat No. PA5-17876, Invitrogen), Anti-Histone H3 (acetyl K27) antibody  
82 (ab4729, Abcam), H3K4me1 Recombinant Polyclonal Antibody (Cat No. 710795,  
83 Invitrogen), normal rabbit and mouse IgG (Santa Cruz Biotechnology)

84

### 85 **Data collection**

86 We collected a variety of functional genomics data, including ATAC-seq, RNA-seq,  
87 RRBS, Hi-C data (see details in Table S1), from the Gene Expression Omnibus (GEO)  
88 and ArrayExpress database. Meanwhile, we downloaded genotype and  
89 Epidemiological data from a SLE case-control study (accession: phs001025.v1) in  
90 Hispanic population (1,393 cases and 8,86 controls) from the dbGaP database with  
91 approval (accessed 29 Sep 2020).

92

### 93 **Analysis of RNA-seq and ATAC-seq data**

94 RNA-seq data were analyzed as described previously with few modifications (21). In  
95 brief, raw sequencing data were mapped to the human reference genome (hg19) using  
96 Hisat2 program (22) with the default setting. Aligned data were processed and  
97 converted into BAM files using SAMtools program (23). The fragments per kilobase  
98 of exon per million fragments mapped (FPKM) values were estimated from the  
99 Cufflinks program to quantify gene expression levels.

100

101 We used a similar method described previously with several modifications (24) to  
102 process the ATAC-seq data. In brief, raw sequencing data were mapped to the human  
103 reference genome (hg19) using Bowtie2 program (25) with the default setting. Tag  
104 per million (TPM) metric, a method commonly used for read counting normalization,  
105 was used to quantitatively present the enrichment of open chromatin states across  
106 regions of interest.

107

### 108 **Identification of allelic chromatin accessibility difference sites**

109 We used a similar approach described previously to call variants and allelic analysis  
110 (20). Briefly, the deduplicated reads in BAM format were realigned and recalibrated,  
111 and genetic variants were called in a multiple-sample joint manner implemented in  
112 the GATK toolkit (version 3.3). We next filtered out variants as follows: (1) mapping  
113 quality score < 20, (2)  $\geq 3$  SNPs detected within 10 bp distance, (3) variant

114 confidence/quality by depth < 2, (4) strand bias score > 50, (5) genotype score < 15  
115 and (6) read depth < 8. Then, we extracted SNPs annotated from dbSNP (Build 150)  
116 that were called as heterozygotes for each sample. For a reasonable comparison, those  
117 heterozygous SNPs identified at least triple in both case and control samples were  
118 retained. Using allelic ratio (20) as a response variable in linear regression model (see  
119 below), we conducted AI analysis on chromatin accessibility for each heterozygous  
120 SNP in a comparison between SLE and controls.

121 Allelic ratio  $\sim \alpha + \beta * \text{disease} + \varepsilon$

122 The p-values and beta coefficients were calculated to estimate the significance of the  
123 association, and the differences between cases and controls, respectively.

124

### 125 **Association analysis**

126 For genotype data from a SLE case-control study in Hispanic population, all typed  
127 SNPs in chromosome 8 were extracted for imputation using TOPMed Imputation  
128 Server (26). To test SNP rs1047643 in association with SLE, we used a method  
129 described previously for univariate and haplotype analyses (27). In brief, the  
130 per-allele odds ratio (OR) and 95% confidence interval (CI) for the rs1047643 was  
131 estimated for SLE risk using a log-additive logistic model with covariates of  
132 populations, sex and five principal components (PCs). We used the haplo.stats  
133 package in R for haplotype analyses with populations, sex and five PCs as covariates.

134

135 **Super-enhancer annotation**

136 We downloaded whole-genome chromatin state segmentation data (core 15-state  
137 model) for 127 cell types from the Roadmap project. As Parker et al. (28) defined, we  
138 consider contiguous genomic region marked by states 6-7 (enhancer states, annotated  
139 by chromHMM) with  $\geq 3$  kb as SE in a cell type. Then, we extracted and annotated  
140 super-enhancers on 8p23 locus.

141

142 **Analysis of eQTL data**

143 We collected eQTL data sets from three large-scale studies, the Genotype-Tissue  
144 Expression (GTEx, v8) (29), the Haploreg v4.1 dataset (30) and the study by Westra  
145 et al. (31). By searching for the SNP rsID or the coordinate, we extracted the linked  
146 genes with query SNPs and plotted the results based on the significance and studies.

147

148 **Hi-C data analysis**

149 For in situ Hi-C dataset (Accession ID: GSE63525), we downloaded the Hi-C binary  
150 file from Rao et al. study (32) and extracted the observed long-range interactions  
151 normalized with Knight-Ruiz matrix balancing (KR) method at 10 kb resolution  
152 across the 8p23.1 region (the coordinate: chr8:11260000-11740000, hg19).

153 For other genome-wide Hi-C (Accession ID: GSE113405) and capture Hi-C (CHi-C)  
154 datasets (Accession ID: GSE81503 and E-MTAB-6621), we used the Hi-C Pipeline  
155 (HiCUP) (33) to truncate and align reads to the human reference genome. The  
156 deduplicated data were then processed using the Homer pipeline (34) to call the

157 significant chromatin interaction at 10 kb resolution. The resulting interactions were  
158 visualized using UCSC Genome Browser or Sushi package in R environment.

159

### 160 **DNA methylation analysis**

161 We downloaded the processed RRBS dataset of DNA methylation profiles on each  
162 CpG site from Scharer et al. report (35) , then extracted and compared CpG  
163 methylation levels on a region of interest between SLE and healthy controls.

164

### 165 **Cell culture**

166 GM11997 B lymphoblastic (purchased from Coriell Institute) cells were cultured in  
167 RPMI-1640 medium, supplemented with 10% FBS (Thermo Fisher Scientific), 2 mM  
168 L-glutamine and 1% penicillin-streptomycin at 37 °C with 5% CO<sub>2</sub>. For perturbation  
169 of STAT3, B cells were plated in 12-well plates or 10 cm dishes one day prior to the  
170 experiment. Cells were then treated with S3I-201 or ML115. Cells were harvested,  
171 washed with PBS and analyzed for proper assays.

172

### 173 **Reverse transcription qPCR**

174 Total RNA was isolated from cells using TRIzol Reagent (Invitrogen) according to  
175 the manufacturer's protocol. 1 µg of total RNA was reverse transcribed using  
176 SuperScript III reverse transcriptase and random hexamer. One-tenth of the RT  
177 reaction was used as a template for real-time PCR using Luna Universal qPCR Master  
178 Mix (New England Biolabs) on a QuantStudio 6 system. Relative expression was

179 calculated with  $2^{-\Delta\Delta C_t}$  using the average value of housekeeping gene *GAPDH*.

180

### 181 **Chromatin immunoprecipitation**

182 ChIP was performed as described previously. (2) Approximately  $10 \times 10^6$  suspension

183 cells were harvested and in 10 ml PBS with 1% formaldehyde for 10 min at room

184 temperature, followed by adding 0.125 M glycine for 5 min. Cells were washed and

185 pelleted by centrifugation and lysed with buffer (50 mM Tris-HCl, pH 7.5, 1%

186 IGEPAL CA-630, 1 mM EDTA, 0.1% SDS, plus 1 mM PMSF) in the presence of

187 protease inhibitors and incubated on ice for 30 min. Cell lysate was sonicated to shear

188 DNA to a length of 200–600 bp. The lysates were centrifuged, and supernatant

189 transferred to new tubes. For immunoprecipitation, approximately  $2 \times 10^6$  cells and

190 2-3  $\mu$ g of antibodies or isotype matched IgG as control were used per ChIP and

191 incubated with supernatant at 4°C on a rotating wheel overnight. Chromatin-antibody

192 complexes were sequentially washed with low-salt buffer, high-salt buffer, LiCl

193 buffer, and TE buffer. Cross-links were reversed by addition of 100  $\mu$ l of 1% SDS

194 plus 100 mM NaHCO<sub>3</sub> and by heating at 65°C overnight. Following

195 phenol/chloroform/isoamyl alcohol extraction, immunoprecipitated DNA was

196 precipitated with isopropyl alcohol and resuspended in nuclease-free water. For the

197 identification of the specific regions of interest, ~10 ng of purified DNA was

198 quantified to determine the percentage of each analyzed region against input DNA.

199 The PCR primers are shown in Table S3.

200

## 201 **Statistical analysis**

202 Data were presented as mean  $\pm$  SD of three replicates unless stated otherwise.

203 Correlation analysis was performed using Pearson's correlation coefficient. The  
204 differences were considered statistically significant at two-sided P-values less than  
205 0.05.

206

207

## 208 **Results**

### 209 **Multi-omics data summary**

210 Functional genomics sequencing data sets comprising 279 samples from eleven  
211 studies were collected (Table S1). Of eleven studies, seven are SLE case-control  
212 studies with data across three immune cell types including B cells, T cells and  
213 Neutrophils (Table S2). Also included in the present study were SNP microarray data  
214 from a SLE GWAS study (n = 2,279).

215

### 216 **Identification of SLE-associated variant showing AI at both chromatin and RNA** 217 **levels**

218 We next designed a two-stage study (Figure 1) to identify putative SLE-associated  
219 functional variants. In stage I, also termed as the discovery stage, two chromatin  
220 accessibility (ATAC-seq) data sets (Accession ID: GSE118253 and GSE71338, Table  
221 S1) comprised 49 samples were analyzed. We focused on those variants displaying  
222 difference in AI of chromatin accessibility at heterozygous SNP sites in a comparison

223 between SLE and controls (see Methods in detail). From the reciprocal validation  
224 between two data sets, SNP rs1047643 was identified to show the significant AI in B  
225 cells from patients with SLE, relative to controls (Figure 2A). Interestingly, in B cells  
226 at different stages, the allelic preference of chromatin accessibility for this  
227 SLE-associated SNP is alterable. For example, the T allele exhibits more preferential  
228 chromatin accessibility in activated B cells from patients, relative to the C allele.  
229 However, the direction is reversed in SLE naive B cells.

230

231 Because the rs1047643 is located in the first exon of *FDFT1* gene (Figure 3E), it  
232 enables us to test the functionality of this variant at the transcriptional level.

233 Analyzing RNA-seq data (Accession ID: GSE118254), we determined the AI of RNA  
234 transcripts for the rs1047643. In line with results shown above, we observed the  
235 dynamic AI pattern on the transcriptional level for the rs1047643 (Figure 2B).

236 Meanwhile, this dynamic allelic expression pattern is specific during B cell  
237 development with SLE (Figure 2C).

238

### 239 **Association with SLE risk in American Hispanic populations**

240 Because SNP rs1047643 has not been reported to be associated with the susceptibility  
241 of SLE and other autoimmune diseases, we next tested the association using a dataset  
242 from an SLE GWAS case-control study. Employing the univariate analysis for SNP  
243 rs1047643 in samples from Hispanic populations, we identified an association of the  
244 rs1047643 with SLE risk at statistical significance of adjusted  $P = 0.02$  (Figure 3A),



245 albeit not reaching the significance after adjustment for 12 GWAS index SNPs (the  
246 top track in Figure 3E, where one SNP rs2736336 is excluded due to its multivariate  
247 alleles). Of the 12 index SNPs, indeed, one index SNP rs17807624 with the statistical  
248 significance with  $P < 1.5 \times 10^{-3}$  using the univariate analysis, is the top signal to  
249 which the SNP rs1047643 is conditional. Thus, we performed haplotype analyses on  
250 these two SNPs (index SNP rs17807624 and rs1047643, Figure 3B). Compared with  
251 the reference haplotype, which carries the alleles associated with a reduced risk in two  
252 SNPs, haplotype 2, which carries the risk-associated alleles, showed a significant  
253 association (adjusted  $P = 0.03$ ).

254

### 255 **Functional annotation**

256 An analysis of eQTL data derived from three independent cohorts indicated both  
257 proximal ( $< 200$  kb) and distal ( $> 200$  kb) regulatory potential for the SNP rs1047643  
258 in normal B or blood cells (Figure 3D). Interestingly, besides correlated with three  
259 adjacent genes (*FDFT1*, *CTSB* and *NEIL2*), the rs1047643 is also an eQTL linked  
260 with an upstream *BLK* gene in a distance of  $\sim 300$  kb, a result that is detected in two  
261 independent data sets. An analysis of RNA-seq data from two independent studies  
262 (Accession ID: GSE118254 and GSE92387, Table S1) consistently showed that  
263 expression patterns for two representative genes (*BLK* and *FDFT1*) are gradually  
264 increased in a developmental process from naive to memory B cells, in particular, the  
265 double negative memory B cell subset in patients with SLE, the pattern that is not  
266 observed in controls (Figure S1 and S2).

267

268 By searching for enhancers and other regulatory elements across 8p23 locus from a  
269 dataset of the 127 epigenomes from Roadmap, we identified a SE with a length of 7kb  
270 in the upstream of *BLK* gene in CD19+ B cells (Epigenome ID: E032, Figure 3E). An  
271 analysis of annotated enhancer elements across the 127 epigenomes showed 43  
272 (33.9%) epigenomes had enhancers at this SE region. Comparative analysis of the  
273 enhancer length at this SE region on the 43 epigenomes further showed that this SE is  
274 specific in CD19+ B cells (Epigenome ID: E032, Figure 3C).

275

276 Analyzing Hi-C data sets from two independent studies in GM12878 cells, we  
277 observed a DNA looping between the SNP rs1047643 within *FDFT1* and the SE  
278 region (Figure 3F). More importantly, in GM12878 B-lymphoblastic cells, this SE  
279 region has a wealth of long-range interactions with adjacent genes (e.g., *BLK*) and  
280 functional elements. In contrast, in another seven cells (Figure 3G), as well as in  
281 normal T cells (Figure S3) and nine selected tissues (Figure S4), these interactions are  
282 either much weaker or completely absent. These results indicate that the physical  
283 interaction between SNP rs1047643 and SE region, and many interactions with this  
284 SE, are specific to B-lymphocytes.

285

286

### 287 **Specificity in B cells**

288 We then hypothesized that the SE region may show aberrant activity in B cells from

289 SLE patients. To test this hypothesis, we conducted quantitative analysis on the same  
290 ATAT-seq data (Accession ID: GSE118253 and GSE71338) used in stage I (see  
291 Methods in detail). Comparison of SE activity in a quantitative manner between SLE  
292 patients and controls indicated that the SE activity is gradually increased through B  
293 cell development in SLE patients (Figure 4A-B), with a hyper-activity being observed  
294 in double negative (DN) B cells in patients, relative to controls (Figure 4B-C).  
295 Similarly, the rs1047643-containing promoter activity also shows up-regulation  
296 towards B cell development in SLE patients (Figure 4D-E). In a comparison of B cell  
297 development on activities of SE and FDFT1 promoter regions in two individuals, the  
298 chromatin accessibility on both regions in an individual with SLE is increased during  
299 B cell development, but remains relatively unchanged in the healthy individual  
300 (Figure 4F-H).

301

302 We also quantitatively compared open chromatin states of SE and FDFT1 promoter  
303 regions in resting naive B cells (Accession ID: GSE71338). Concordant with the  
304 results from active B cell subsets, the open chromatin states on both regions are low  
305 in non-active B cells from SLE patients, relative to healthy controls (Figure S5).

306

307 We further conducted quantitative analyses on ATAC-seq data from another two  
308 independent studies in two immune cell types, T cells and neutrophils (Accession ID:  
309 GSE139359 and GSE110017, Table S1). The results showed that there was no  
310 marked enrichment of ATAC-seq reads on both the SE and FDFT1 promoter regions

311 in these two immune cell types for both SLE and controls (Figure S6). Collectively,  
312 these results suggest a B cell specific, rs1047643-interacting SE whose activity is  
313 aberrant in SLE B cell development.

314

315

### 316 **Hypomethylation in SLE B cells**

317 We further analyzed DNA methylation in the SE region using RRBS data in B cell  
318 development in a comparison between SLE and controls (Accession ID: GSE118255,  
319 Table S1). Our results show that DNA methylation levels on the SE region are  
320 gradually decreased in the developmental process from resting native (rN) to memory  
321 B cells in patients with SLE (Figure 5A). In contrast, there is no such obvious change  
322 of DNA methylation pattern in the control group. A correlation analysis also showed  
323 a marked negative correlation between open chromatin states (TPM values, also  
324 presented on Figure 4E) and DNA methylation levels at the SE region in the SLE  
325 group, relative to the healthy controls (Figure 5B). Together, these results reinforce  
326 the aberrant activity of SE in developmental process of B-lymphocytes in patients  
327 with SLE.

328

### 329 **STAT3 binding on both super-enhancer and rs1047643-residing regions**

330 TF-motif enrichment and binding analysis using the ENCODE TF ChIP-seq dataset  
331 (v3) predicted that STAT3 may bind to both the SNP rs1047643-containing promoter  
332 and SE regions (data not shown). To validate the finding, we designed two pairs of

333 primers (SE5 and SE3, Figure 6A) to determine the STAT3 binding on SE region and  
334 its contribution to the SE activity using STAT3, H3K4me1 and H3K27ac ChIP-qPCR  
335 assays in GM11997 cells. Under normal culture conditions, we validated that  
336 pSTAT3, H3K4me1 and H3K27ac modifications are remarkably enriched on the SE  
337 region in B-lymphoblastic cells, relative to IgG mock controls (Figure 6A, 6E and 6F).  
338 We then conducted both the inhibition and activation of STAT3 DNA binding activity  
339 using two small molecules. In B-lymphoblastic cells challenged with S3I-201, a  
340 STAT3 DNA binding inhibitor, both the DNA binding of STAT3 on SE region and  
341 the SE activity are significantly reduced (Figure 6A), relative to control. In GM11997  
342 cells treated with ML115, a selective activator of STAT3 (36), both the STAT3 DNA  
343 binding capability on SE region and the SE activity are significantly increased (Figure  
344 6E), relative to controls. These results together demonstrate that STAT3 directly  
345 modulates the SE activity.

346

347 We next tested whether the STAT3 might also regulate the rs1047643-residing  
348 regions. Using allelic qPCR assay, we confirmed that genomic DNA in the GM11997  
349 cells carries a heterozygous variant for the SNP rs1047643 (Figure S7), enabling the  
350 AI analysis in this cell model. In GM11997 cells treated with the STAT3 inhibitor  
351 S3I-201, STAT3 binding on the risk allele T is significantly reduced, relative to the  
352 rs1049643-C allele (Figure 6B). Concordantly, the expression level on the  
353 rs1049643-T allele is also declined after treatment with S3I-201 for 24 hours, relative  
354 to the C allele (Figure 6C). Conversely, we observed an increase of both STAT3

355 DNA binding and expression at the rs1049643-T allele in cells stimulated with the  
356 STAT3 activator ML115 (Figure 6F-G). These results collectively suggest that the  
357 risk rs1049643-T allele is preferentially bound by STAT3 in B cells.

358

359 We also determined RNA expression of *BLK* and *FDFT1*, two representative genes  
360 that correlate with the risk rs1047643. The expression levels of both genes are  
361 decreased with the treatment of S3I-201 (Figure 6D), and up-regulated with the  
362 STAT3 activator ML115 (Figure 6H). These results suggest the STAT3-binding risk  
363 allele T is associated with increased expression of *BLK* and *FDFT1*.

364

365

## 366 **Discussion**

367 In the present study, by integrating a variety of functional genomic data, we  
368 performed AI analysis to uncover novel functional promising variants and their  
369 regulatory targets in association with SLE. Of note, the diversity of genomic data  
370 types from this comprehensive data collection for autoimmune diseases allowed us to  
371 develop an approach not used before for accessing the role of variants in SLE disease  
372 activity.

373

374 One of the most significant findings is the identification of a novel risk variant  
375 rs1047643. The association study shows that the rs1049643-T is a risk allele for SLE.  
376 Our AI analyses indicate that the rs1049643-T allele resides in more open chromatin

377 state and has higher expression in SLE memory B cell subsets, relative to the C allele.  
378 Functional study further provides evidence that the rs1049643-T allele is  
379 preferentially bound by STAT3. The SNP rs1047643 is also an eQTL linked with  
380 both proximal and distal genes, including *BLK*, the gene that plays a critical role in B  
381 lymphocyte development (37). These results demonstrate that this novel  
382 SLE-associated risk rs1047643 whose functionality is mediated by STAT3, may play  
383 a role in allele-specific control of adjacent genes at 8p23 locus in B cells. Despite no  
384 report for association with other autoimmune diseases, this SNP has been associated  
385 with multiple myeloma (38) and follicular lymphoma (39), two malignant diseases  
386 whose pathogenesis is partially associated with the dysfunction of B cells.  
387 Specifically, hyperactive STAT3 has been reported to be associated with poor  
388 survival in both diseases (40, 41). Therefore, our findings may provide a clue for  
389 genetic and mechanical studies on those B cell associated diseases.  
390  
391 Another intriguing finding in this study is the identification of an aberrant activity of a  
392 SE in lupus B cell subsets, particularly the hyperactivity in memory B cells. In  
393 contrast, there is no enhancer activity in other immune cells (T cells and neutrophils  
394 analyzed in this study) in patients with SLE. We also demonstrate that the aberrant  
395 activity of the SE can be mediated by STAT3. Some studies have consistently  
396 reported a critical role of STAT3 in the B cell maturation, differentiation, as well as  
397 the autoimmunity (42, 43). These reports further support the significance of  
398 STAT3-mediated SE aberration in B cells with SLE.

399

400 Several studies have highlighted the 8p23 locus as a major SLE susceptibility region  
401 (44). Our study further expands the significance at this locus. We speculate that the  
402 8p23 locus may play functional roles in B cell development in both genetic and  
403 epigenetic fashions. Besides the SNP rs1047643 discovered in the present study, there  
404 are 13 SLE-associated GWAS leading SNPs reported in this locus. Of 13 SNPs, six  
405 SNPs (Figure 3E) directly sit in the SE region, suggesting these risk variants may play  
406 roles in a genetic interaction way. For example, our study and others together suggest  
407 that there are a few cis-eQTLs linked with transcriptional levels of *BLK* (11, 44).  
408 Epigenetically, the SLE-associated SE has physical interactions with adjacent genes,  
409 including *BLK* and *FDFT1*, and the risk rs1047643-residing region. This indicates a  
410 potentially complex role of the variant rs1047643 for broad regulation by physically  
411 contacting the SE. Thus, our data provide new insights into the molecular  
412 mechanisms by merging genetic susceptibility with epigenetic impacts on gene  
413 expression for autoimmune diseases.

414

415 The *FDFT1* is a gene encoding for squalene synthase, the enzyme that catalyzes the  
416 early step in the cholesterol biosynthetic pathway (45). Previous studies have shown  
417 dyslipidemia, with elevations in total cholesterol, low-density lipoprotein, triglyceride  
418 levels in patients with lupus (46), especially in the active disease. Our multi-omics  
419 data indicate that the SNP rs1047643-linked *FDFT1* is aberrantly activated in B cell  
420 development in SLE patients, thereby providing an insight into the genetic



421 implication of lipid metabolism for autoimmune diseases.

422

423 The limitations of this study include, due to the presence of six SLE GWAS tagging

424 SNPs in SE region, we are unclear how they genetically influence the SE activity

425 during B cell development. Second, it remains unclear how the AI pattern occurs in

426 naive B cells with lupus. The C allele shows more open chromatin state in SLE naive

427 B cells, this can't be explained by STAT3 allelic DNA binding at the T allele. This

428 implies that some other factors may also contribute to this dynamic AI pattern.

429

430 In conclusion, we identified a novel functional variant and B cell specific SE in

431 association with the SLE pathogenesis, both mediated by STAT3, and influencing

432 their gene targets. This insight into the mechanism by which manipulation of STAT3

433 affects the SE activity and its associated gene expression in B cells may have

434 implications for future drug development in autoimmunity.

435

436

### 437 **Author contributions**

438 Y.Z. conceived and designed the study, collected and analyzed the data, conducted

439 the experiments, wrote the manuscript. D.A. contributed materials and data, and

440 assisted in data analysis, interpreted the data and edited the manuscript. All authors

441 read and approved the final manuscript.

442

443 **Declaration of interests**

444 The authors declare no competing financial interests.

445

446 **Funding**

447 This study was supported by the HudsonAlpha Institute Fund. The funders had no  
448 role in study design, data collection and analysis, decision to publish, or preparation  
449 of the manuscript.

450

451 **Acknowledgments**

452 We thank Dr. Le Su for insightful suggestions, technical discussions and critical  
453 reading of the manuscript. This study was supported by the HudsonAlpha institutional  
454 funds. The funders had no role in study design, data collection and analysis, decision  
455 to publish or preparation of the manuscript.

456

457 **References**

- 458 1. Parker SCJ, Stitzel ML, Taylor DL, Orozco JM, Erdos MR, Akiyama JA, et al.  
459 Chromatin stretch enhancer states drive cell-specific gene regulation and harbor  
460 human disease risk variants. *Proceedings of the National Academy of Sciences*.  
461 2013;110(44):17921-6.
- 462 2. Whyte WA, Orlando DA, Hnisz D, Abraham BJ, Lin CY, Kagey MH, et al.  
463 Master Transcription Factors and Mediator Establish Super-Enhancers at Key Cell  
464 Identity Genes. *Cell*. 2013;153(2):307-19.

- 465 3. Vahedi G, Kanno Y, Furumoto Y, Jiang K, Parker SCJ, Erdos MR, et al.  
466 Super-enhancers delineate disease-associated regulatory nodes in T cells. *Nature*.  
467 2015;520(7548):558-62.
- 468 4. Hnisz D, Abraham Brian J, Lee Tong I, Lau A, Saint-André V, Sigova Alla A, et  
469 al. Super-Enhancers in the Control of Cell Identity and Disease. *Cell*.  
470 2013;155(4):934-47.
- 471 5. Decker T, Kovarik P. Serine phosphorylation of STATs. *Oncogene*.  
472 2000;19(21):2628-37.
- 473 6. Levy DE, Darnell JE. STATs: transcriptional control and biological impact.  
474 *Nature Reviews Molecular Cell Biology*. 2002;3(9):651-62.
- 475 7. Yu H, Pardoll D, Jove R. STATs in cancer inflammation and immunity: a leading  
476 role for STAT3. *Nature Reviews Cancer*. 2009;9(11):798-809.
- 477 8. Rahman A, Isenberg DA. Systemic Lupus Erythematosus. *New England Journal*  
478 *of Medicine*. 2008;358(9):929-39.
- 479 9. Catalina MD, Owen KA, Labonte AC, Grammer AC, Lipsky PE. The  
480 pathogenesis of systemic lupus erythematosus: Harnessing big data to understand the  
481 molecular basis of lupus. *Journal of Autoimmunity*. 2020;110:102359.
- 482 10. Yin X, Kim K, Suetsugu H, Bang S-Y, Wen L, Koido M, et al. Meta-analysis of  
483 208370 East Asians identifies 113 susceptibility loci for systemic lupus  
484 erythematosus. *Annals of the Rheumatic Diseases*. 2021;80(5):632-40.
- 485 11. Guthridge JM, Lu R, Sun H, Sun C, Wiley GB, Dominguez N, et al. Two  
486 functional lupus-associated BLK promoter variants control cell-type- and

- 487 developmental-stage-specific transcription. *American journal of human genetics*.  
488 2014;94(4):586-98.
- 489 12. Sun C, Molineros JE, Looger LL, Zhou X-j, Kim K, Okada Y, et al. High-density  
490 genotyping of immune-related loci identifies new SLE risk variants in individuals  
491 with Asian ancestry. *Nature Genetics*. 2016;48(3):323-30.
- 492 13. Morris DL, Sheng Y, Zhang Y, Wang Y-F, Zhu Z, Tomblinson P, et al.  
493 Genome-wide association meta-analysis in Chinese and European individuals  
494 identifies ten new loci associated with systemic lupus erythematosus. *Nature Genetics*.  
495 2016;48(8):940-6.
- 496 14. Gallagher MD, Chen-Plotkin AS. The Post-GWAS Era: From Association to  
497 Function. *American journal of human genetics*. 2018;102(5):717-30.
- 498 15. Pastinen T, Hudson TJ. Cis-Acting Regulatory Variation in the Human Genome.  
499 *Science*. 2004;306(5696):647-50.
- 500 16. Yan H, Yuan W, Velculescu VE, Vogelstein B, Kinzler KW. Allelic variation in  
501 human gene expression. *Science*. 2002;297(5584):1143.
- 502 17. Li Q, Seo JH, Stranger B, McKenna A, Pe'er I, Laframboise T, et al. Integrative  
503 eQTL-based analyses reveal the biology of breast cancer risk loci. *Cell*.  
504 2013;152(3):633-41.
- 505 18. Zhang S, Zhang H, Zhou Y, Qiao M, Zhao S, Kozlova A, et al. Allele-specific  
506 open chromatin in human iPSC neurons elucidates functional disease variants.  
507 *Science*. 2020;369(6503):561-5.
- 508 19. Pollard KS, Serre D, Wang X, Tao H, Grundberg E, Hudson TJ, et al. A

- 509 genome-wide approach to identifying novel-imprinted genes. *Human genetics*.  
510 2008;122(6):625-34.
- 511 20. Zhang Y, Li X, Gibson A, Edberg J, Kimberly RP, Absher DM. Skewed allelic  
512 expression on X chromosome associated with aberrant expression of XIST on  
513 systemic lupus erythematosus lymphocytes. *Human molecular genetics*.  
514 2020;29(15):2523-34.
- 515 21. Zhang Y, Wagner EK, Guo X, May I, Cai Q, Zheng W, et al. Long intergenic  
516 non-coding RNA expression signature in human breast cancer. *Scientific reports*.  
517 2016;6:37821.
- 518 22. Kim D, Paggi JM, Park C, Bennett C, Salzberg SL. Graph-based genome  
519 alignment and genotyping with HISAT2 and HISAT-genotype. *Nature biotechnology*.  
520 2019;37(8):907-15.
- 521 23. Li H, Handsaker B, Wysoker A, Fennell T, Ruan J, Homer N, et al. The  
522 Sequence Alignment/Map format and SAMtools. *Bioinformatics*.  
523 2009;25(16):2078-9.
- 524 24. Zhang Y, Delahanty R, Guo X, Zheng W, Long J. Integrative genomic analysis  
525 reveals functional diversification of APOBEC gene family in breast cancer. *Human*  
526 *Genomics*. 2015;9(1):34.
- 527 25. Langmead B, Salzberg SL. Fast gapped-read alignment with Bowtie 2. *Nature*  
528 *methods*. 2012;9(4):357-9.
- 529 26. Das S, Forer L, Schonherr S, Sidore C, Locke AE, Kwong A, et al.  
530 Next-generation genotype imputation service and methods. *Nat Genet*.

- 531 2016;48(10):1284-7.
- 532 27. Shi J, Zhang Y, Zheng W, Michailidou K, Ghoussaini M, Bolla MK, et al.  
533 Fine-scale mapping of 8q24 locus identifies multiple independent risk variants for  
534 breast cancer. *Int J Cancer*. 2016;139(6):1303-17.
- 535 28. Parker SC, Stitzel ML, Taylor DL, Orozco JM, Erdos MR, Akiyama JA, et al.  
536 Chromatin stretch enhancer states drive cell-specific gene regulation and harbor  
537 human disease risk variants. *Proceedings of the National Academy of Sciences of the*  
538 *United States of America*. 2013;110(44):17921-6.
- 539 29. Consortium GT, Laboratory DA, Coordinating Center -Analysis Working G,  
540 Statistical Methods groups-Analysis Working G, Enhancing Gg, Fund NIHC, et al.  
541 Genetic effects on gene expression across human tissues. *Nature*.  
542 2017;550(7675):204-13.
- 543 30. Ward LD, Kellis M. HaploReg v4: systematic mining of putative causal variants,  
544 cell types, regulators and target genes for human complex traits and disease. *Nucleic*  
545 *acids research*. 2016;44(D1):D877-81.
- 546 31. Westra H-J, Peters MJ, Esko T, Yaghootkar H, Schurmann C, Kettunen J, et al.  
547 Systematic identification of trans eQTLs as putative drivers of known disease  
548 associations. *Nature Genetics*. 2013;45(10):1238-43.
- 549 32. Rao Suhas SP, Huntley Miriam H, Durand Neva C, Stamenova Elena K,  
550 Bochkov Ivan D, Robinson James T, et al. A 3D Map of the Human Genome at  
551 Kilobase Resolution Reveals Principles of Chromatin Looping. *Cell*.  
552 2014;159(7):1665-80.

- 553 33. Wingett S, Ewels P, Furlan-Magaril M, Nagano T, Schoenfelder S, Fraser P, et al.  
554 HiCUP: pipeline for mapping and processing Hi-C data. *F1000Research*.  
555 2015;4(1310).
- 556 34. Heinz S, Benner C, Spann N, Bertolino E, Lin YC, Laslo P, et al. Simple  
557 Combinations of Lineage-Determining Transcription Factors Prime  
558 *cis*-Regulatory Elements Required for Macrophage and B Cell Identities.  
559 *Molecular Cell*. 2010;38(4):576-89.
- 560 35. Scharer CD, Blalock EL, Mi T, Barwick BG, Jenks SA, Deguchi T, et al.  
561 Epigenetic programming underpins B cell dysfunction in human SLE. *Nature*  
562 *Immunology*. 2019;20(8):1071-82.
- 563 36. Madoux F, Koenig M, Nelson E, Chowdhury S, Cameron M, Mercer B, et al.  
564 Modulators of STAT Transcription Factors for the Targeted Therapy of Cancer  
565 (STAT3 Activators). Bethesda: National Center for Biotechnology Information; 2010.
- 566 37. Saijo K, Schmedt C, Su Ih, Karasuyama H, Lowell CA, Reth M, et al. Essential  
567 role of Src-family protein tyrosine kinases in NF- $\kappa$ B activation during B cell  
568 development. *Nature Immunology*. 2003;4(3):274-9.
- 569 38. Van Ness B, Ramos C, Haznadar M, Hoering A, Haessler J, Crowley J, et al.  
570 Genomic variation in myeloma: design, content, and initial application of the Bank  
571 On A Cure SNP Panel to detect associations with progression-free survival. *BMC*  
572 *medicine*. 2008;6:26.
- 573 39. Skibola CF, Bracci PM, Halperin E, Nieters A, Hubbard A, Paynter RA, et al.  
574 Polymorphisms in the Estrogen Receptor 1 and Vitamin C and Matrix

- 575 Metalloproteinase Gene Families Are Associated with Susceptibility to Lymphoma.  
576 PLOS ONE. 2008;3(7):e2816.
- 577 40. Huang X, Meng B, Iqbal J, Ding BB, Perry AM, Cao W, et al. Activation of the  
578 STAT3 signaling pathway is associated with poor survival in diffuse large B-cell  
579 lymphoma treated with R-CHOP. *Journal of clinical oncology*. 2013;31(36):4520-8.
- 580 41. Jung S-H, Ahn S-Y, Choi H-W, Shin M-G, Lee S-S, Yang D-H, et al. STAT3  
581 expression is associated with poor survival in non-elderly adult patients with newly  
582 diagnosed multiple myeloma. *Blood Res*. 2017;52(4):293-9.
- 583 42. Avery DT, Deenick EK, Ma CS, Suryani S, Simpson N, Chew GY, et al. B cell–  
584 intrinsic signaling through IL-21 receptor and STAT3 is required for establishing  
585 long-lived antibody responses in humans. *Journal of Experimental Medicine*.  
586 2010;207(1):155-71.
- 587 43. Ding C, Chen X, Dascani P, Hu X, Bolli R, Zhang H-g, et al. STAT3 Signaling in  
588 B Cells Is Critical for Germinal Center Maintenance and Contributes to the  
589 Pathogenesis of Murine Models of Lupus. *The Journal of Immunology*.  
590 2016;196(11):4477-86.
- 591 44. Demirci FY, Wang X, Morris DL, Feingold E, Bernatsky S, Pineau C, et al.  
592 Multiple signals at the extended 8p23 locus are associated with susceptibility to  
593 systemic lupus erythematosus. *Journal of Medical Genetics*. 2017;54(6):381-9.
- 594 45. Tozawa R-i, Ishibashi S, Osuga J-i, Yagyu H, Oka T, Chen Z, et al. Embryonic  
595 Lethality and Defective Neural Tube Closure in Mice Lacking Squalene Synthase.  
596 *Journal of Biological Chemistry*. 1999;274(43):30843-8.



597 46. Tisseverasinghe A, Lim S, Greenwood C, Urowitz M, Gladman D, Fortin PR.  
598 Association between serum total cholesterol level and renal outcome in systemic  
599 lupus erythematosus. *Arthritis & Rheumatism*. 2006;54(7):2211-9.

600

601

## 602 **Figure legends**

603 **Figure 1. Schematic of the study design.** On the basis of the functional genomic  
604 data feature, a two-stage study was designed. Summary of data sets are available in  
605 Table S1 and S2.

606

607 **Figure 2. Change of allelic chromatin accessibility and expression in B cell**  
608 **subtypes from SLE patients and controls.** (A) Forest plot showing AI of allelic  
609 chromatin state of SNP rs1047643 in both resting naive (rN) and activated (Non-rN)  
610 B cells in patients of SLE compared with healthy controls. The plot in the right panel  
611 displays the 95% of confidence interval of beta-value. (B-C) Boxplots showing allelic  
612 expression of SNP rs1047643 in both rN and activated B cells in patients with SLE as  
613 compared with healthy individuals. All raw data are available in Figure 2—source  
614 data 1.

615

616 **Figure 3. Association analysis and functional prediction of SNP rs1047643.** (A)  
617 Association results for the SNP rs1047643 with SLE risk in single marker analyses.  
618 MAF, minor allele frequency; OR, odds ratio; CI, confidence interval. (B) Haplotype

619 analyses of the two SNPs (SNP1: GWAS indexed SNP rs17807624; SNP2:  
620 rs1047643) in relation to SLE risk. Baseline (the reference haplotype) represents the  
621 alleles associated with a reduced risk in two SNPs. (C) Barplot showing the genomic  
622 length of chromHMM-annotated enhancer state on the super-enhancer region (blue  
623 highlighted in 3C) in 43 epigenomes. (D) Plot shows the eQTL result of SNP  
624 rs1047643 in whole blood or B cells from three databases (shown in y-axis). (E)  
625 Genomic annotations of the SNP rs1047643. The three tracks show locations of 13  
626 GWAS index SNP, gene annotation and 15-state chromatin segments in CD19+ B  
627 cells at 8p23 locus, respectively. Vertical blue and purple lines, represents the  
628 location of super-enhancer and SNP rs1047643, respectively. (F) Long-range  
629 interaction between a super-enhancer and SNP rs1047643. The two tracks show  
630 chromatin interactions from two independent studies using whole-genome Hi-C and  
631 capture Hi-C technologies, respectively. Orange curves show the interactions between  
632 the super-enhancer and the SNP rs1047643. (G) Heatmaps showing the 3D DNA  
633 interactions at 8p23.1 locus in eight cell lines. The rectangle represents interactions  
634 between the super-enhancer and the SNP rs1047643. All raw data are available in  
635 Figure 3—source data 1.

636

637 **Figure 4. Aberration of super-enhancer and *FDFT1* promoter region in B cell**  
638 **subtypes from SLE patients.** (A) Empirical cumulative distribution of TPM values  
639 per 50-bp window across the 7kb SE region in B cell subsets for disease and control  
640 groups. (B) Plots showing the TPM values at the third quartile (Q3) across B cell

641 subtypes as a comparison between SLE and controls. (C) Empirical cumulative  
642 distribution of TPM values on the SE region (same as shown in A) in a comparison  
643 between two groups across four B cell subtypes. (D) Boxplots showing the TPM  
644 values per 50-bp window at the *FDFTI* promoter region in B cell subtypes for SLE  
645 and controls. The black lines and grey areas represent the linear regression results  
646 towards the B cell development from T3 to DN stages, and 95% of CI. (E) Plots  
647 showing the correlation between super-enhancer and *FDFTI* promoter regions based  
648 on mean TPM values with respect to B cell subtypes in SLE and controls. (F) Wiggle  
649 plot showing the enrichment of open chromatin states at 8p23.1 locus in B cell  
650 subtypes for two individuals (a healthy individual at upper panel, and a patient with  
651 SLE at lower panel). Purple and green vertical lines represent the locations for  
652 super-enhancer and *FDFTI* promoter, respectively. Quantitative comparison of  
653 chromatin accessibility states in SE (G) and *FDFTI* promoter regions (H) with  
654 respect to B cell subtypes. All raw data are available in Figure 4—source data 1.

655

656 **Figure 5. Hypomethylation in super-enhancer region in B cell subtypes from**  
657 **SLE patients.** (A) Boxplots showing the CpG methylation levels per 50-bp window  
658 in 7kb SE region in B cell subtypes for SLE and control groups. The black and red  
659 lines represent the linear regression results towards the B cell development from rN to  
660 DN stages for SLE and controls, respectively. (B) Plots showing the correlation  
661 between TPM values (y-axis) and DNA methylation levels (x-axis) averaged over  
662 each B cell type in SLE and controls. All raw data are available in Figure 5—source

663 data 1.

664

665 **Figure 6. Contribution of STAT3 modulates the enhancer activity and**

666 **SNP-residing locus in cultured GM11997 cells.** (A) ChIP-qPCR for H3K27ac (left

667 lower panel), H3K4me1 (middle lower panel) and pSTAT3 (right) at 8p23

668 super-enhancer region following 40  $\mu$ M S3I-201 treatment for 24h. Left upper panel:

669 UCSC genome browser showing the location of two pairs of qPCR primers (SE5 and

670 SE3) on the SE region (yellow). Two tracks shown below are the enrichment of

671 H3K27ac and H3K4me1 across the SE region. (B) Allelic ChIP-qPCR for pSTAT3

672 binding and (C) allelic RT-qPCR on SNP rs1047643 (T vs C alleles) following 40

673  $\mu$ M S3I-201 treatment for 24h. (D) RT-qPCR with RNA from B-lymphoblastic cells

674 that have been challenged with S3I-201 for 24h as indicated. The fold changes for the

675 rs1047643-associated *BLK* and *FDFT1* genes in response to different concentrations

676 of S3I-201 compared to vehicle (0.1% DMSO) as control, which was set as 1 in all

677 cases, are presented. (E) ChIP-qPCR for H3K27ac (left), and pSTAT3 (right) at 8p23

678 super-enhancer region following 100 nM ML115 treatment for 6h. (F) Allelic

679 ChIP-qPCR for pSTAT3 binding and (G) allelic RT-qPCR on SNP rs1047643 (T vs

680 C alleles) following 100 nM ML115 treatment for 6h. (H) RT-qPCR with RNA from

681 B-lymphoblastic cells that have been challenged with ML115 for 6h as indicated. The

682 fold changes for the rs1047643-associated *BLK* and *FDFT1* genes in response to

683 different concentrations of ML115 compared to vehicle (0.1% DMSO) as control,

684 which was set as 1 in all cases, are presented. NS, not significance; \*,  $P < 0.05$ ; \*\*,  $P$

685 < 0.01; \*\*\*,  $P < 0.005$ .

686

687

## 688 **Supplementary data**

689 **Table S1. Summary of data sets used in the study.** Functional genomics data sets,  
690 including ATAC-seq, RNA-seq and RRBS-seq data sets from seven SLE case-control  
691 studies (Table S2), and Hi-C data sets in multiple cell lines, and a SNP microarray  
692 data set from a lupus GWAS study.

693

694 **Table S2. List of data sets from seven SLE case-control studies.**

695

696 **Table S3: List of primers used in this study.**

697

698 **Figure S1 Expression pattern of FDFT1 and BLK across B cell subtypes in a**  
699 **comparison from a case-control study.** Comparison of FDFT1 (A) and BLK (B)  
700 expression profiles in B cell subtypes from patients with SLE and healthy individuals  
701 (Accession ID: GSE118254).

702

703 **Figure S2 Expression pattern of FDFT1 and BLK across B cell subtypes in a**  
704 **comparison between patients with SLE and healthy controls.** Comparison of  
705 FDFT1 (A) and BLK (B) expression profiles in B cell subtypes from a case-control  
706 study (Accession ID: GSE92387).

707

708 **Figure S3** Chromatin interactions with *FDFT1* promoter region (marked in green  
709 arrow) on 8p23 locus from CHi-C data with duplicates in two types of normal T cells.  
710 Orange arrow represents the location of super-enhancer identified in this study.

711

712 **Figure S4** Heatmaps of Long-range chromatin interactions from Hi-C data in 8p23  
713 locus at 10 kb (or 20 kb) resolution in a panel of human tissues from the 3D Genome  
714 Browser. The circles shown on heatmaps are the interaction score between SNP  
715 rs1047643 and SE region.

716

717 **Figure S5 Aberration of super-enhancer in resting naive B cell subtypes from**  
718 **SLE patients in relation to healthy controls.** (A) Wiggle plot showing the  
719 enrichment of open chromatin states at 8p23.1 locus in resting naive B cells from  
720 eight individuals. Blue and purple vertical lines represent the locations of SE and  
721 *FDFT1* promoter, respectively. (B-C) Quantitative comparison of chromatin  
722 accessibility states in the SE and *FDFT1* promoter regions in naive B cells in a  
723 comparison between SLE and controls.

724

725 **Figure S6 No super-enhancer activity in T and neutrophils from SLE patients**  
726 **and controls.** (A-B) Empirical cumulative distribution of TPM values per 50-bp  
727 window and enrichment of ATAC-seq reads (TPM value) across the SE region in  
728 neutrophil cell subsets from SLE patients and controls. (C-D) Empirical cumulative

729 distribution of TPM values per 50-bp window and enrichment of ATAC-seq reads  
730 (TPM value) across the SE region in two T cell subsets from SLE patients. (E)  
731 Wiggle plot showing the enrichment of open chromatin states at 8p23.1 locus in  
732 neutrophils and T cells. Blue and purple vertical lines represent the locations of SE  
733 and *FDFT1* promoter, respectively.

734

735 **Figure S7 Genotyping of SNP rs1047643 in GM11997 genomic DNA using allelic**  
736 **qPCR analysis.** Amplification plots are presented for two alleles.

737

738 **Figure 2—source data 1**

739 **Source files for presenting results in Figure 2.**

740 This zip archive contains all source data used for the quantitative analyses shown in  
741 Fig. 2.

742

743 **Figure 3—source data 1**

744 **Source files for presenting results in Figure 3.**

745 This zip archive contains all source data used for the quantitative analyses shown in  
746 Fig. 3.

747

748 **Figure 4—source data 1**

749 This txt file contains source data used for the quantitative analyses shown in Fig. 4.

750

751 **Figure 5—source data 1**

752 This txt file contains source data used for the quantitative analyses shown in Fig. 5.

753



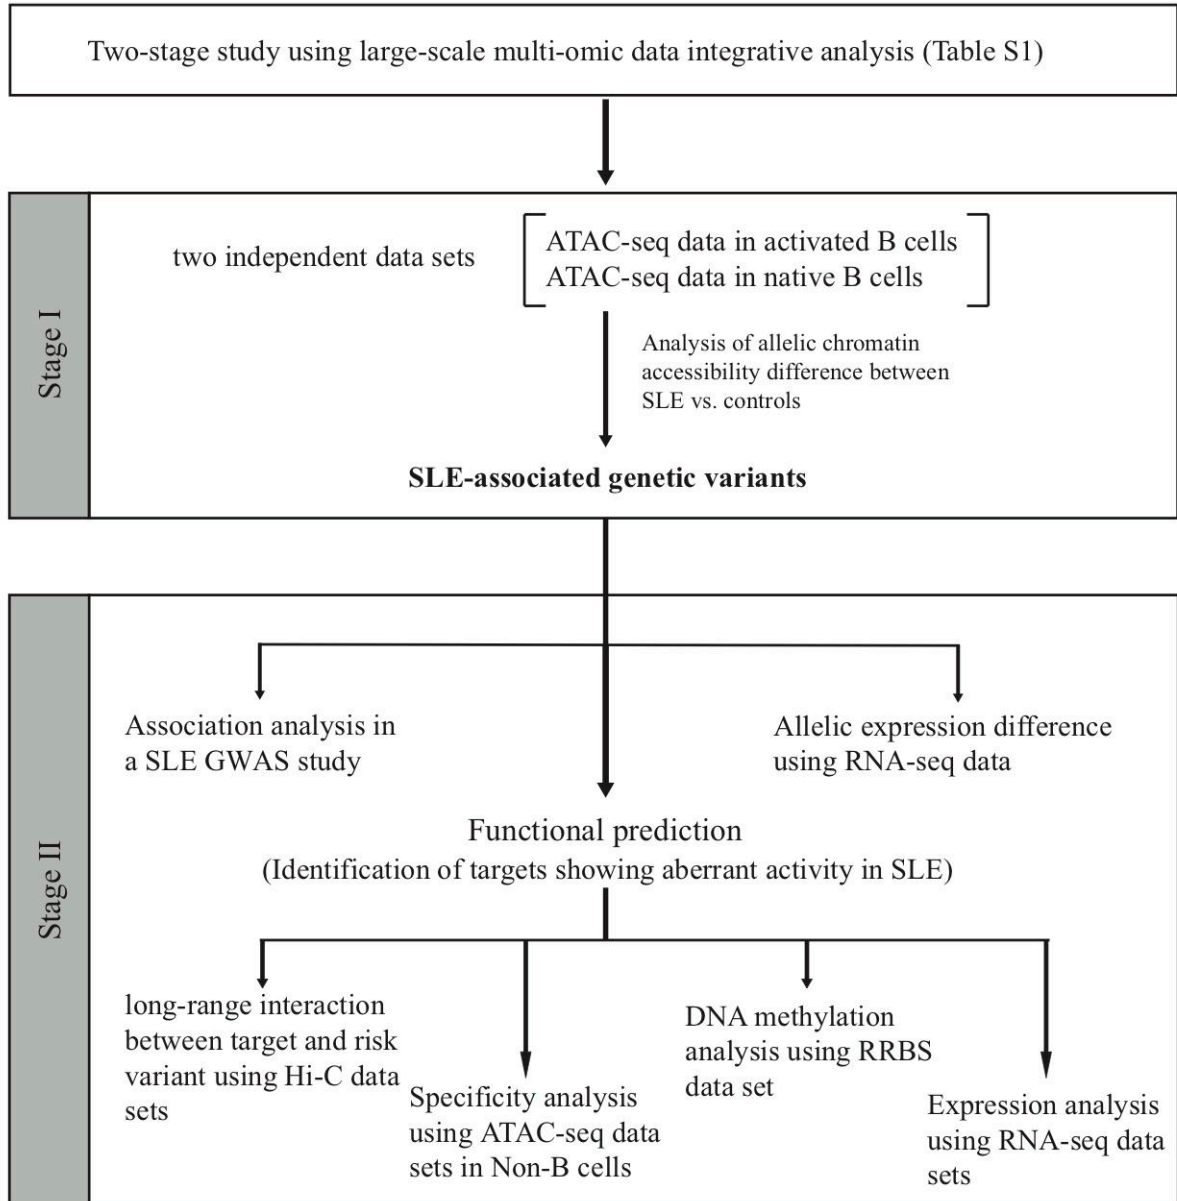

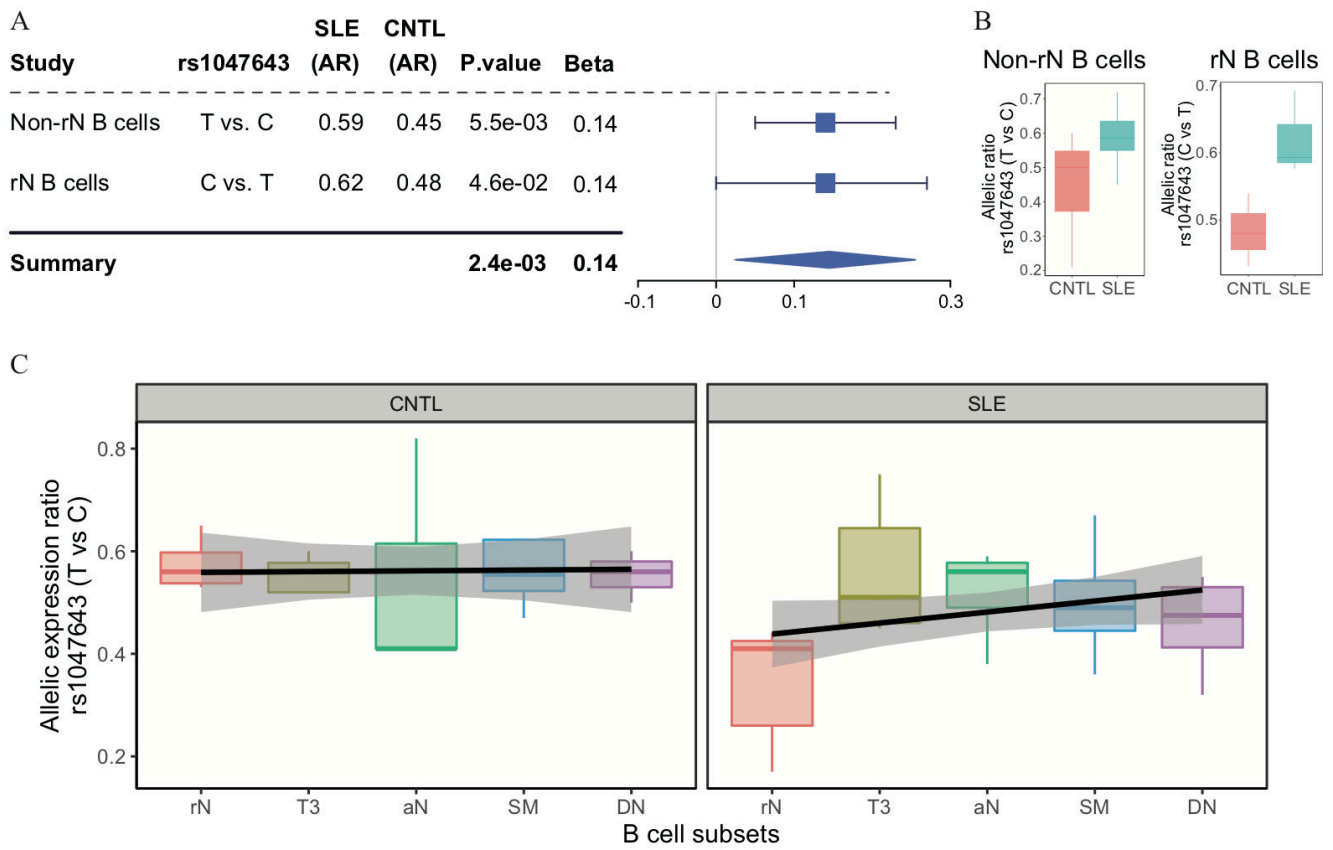

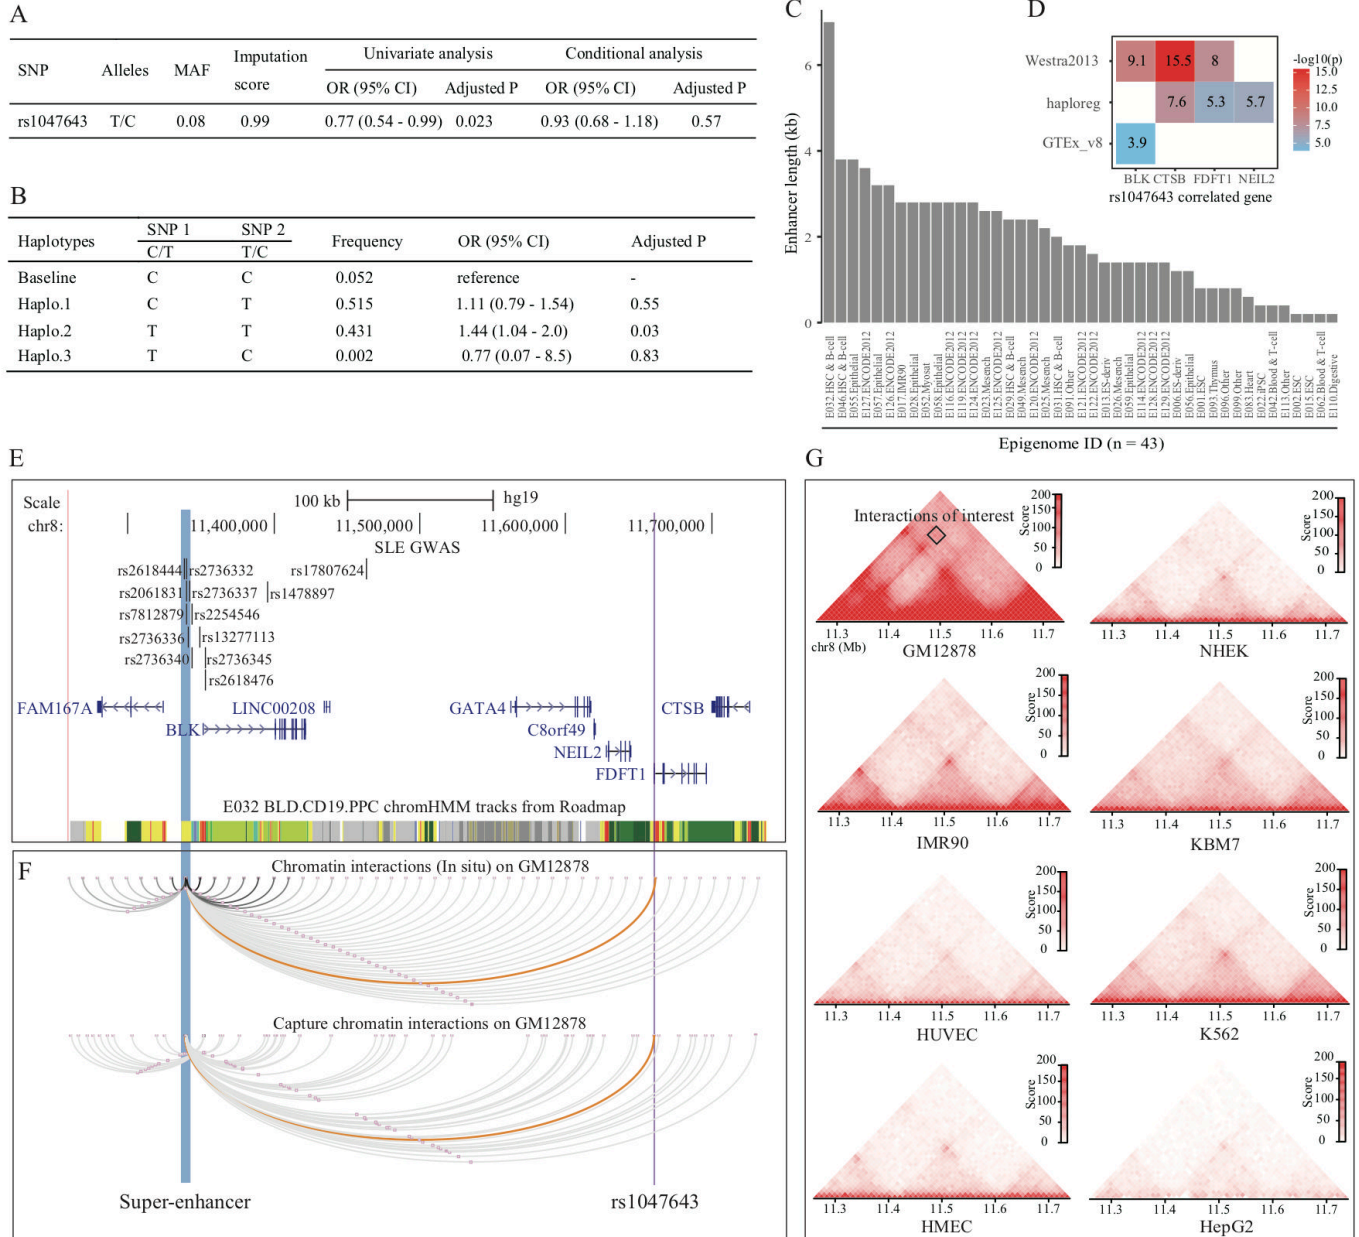

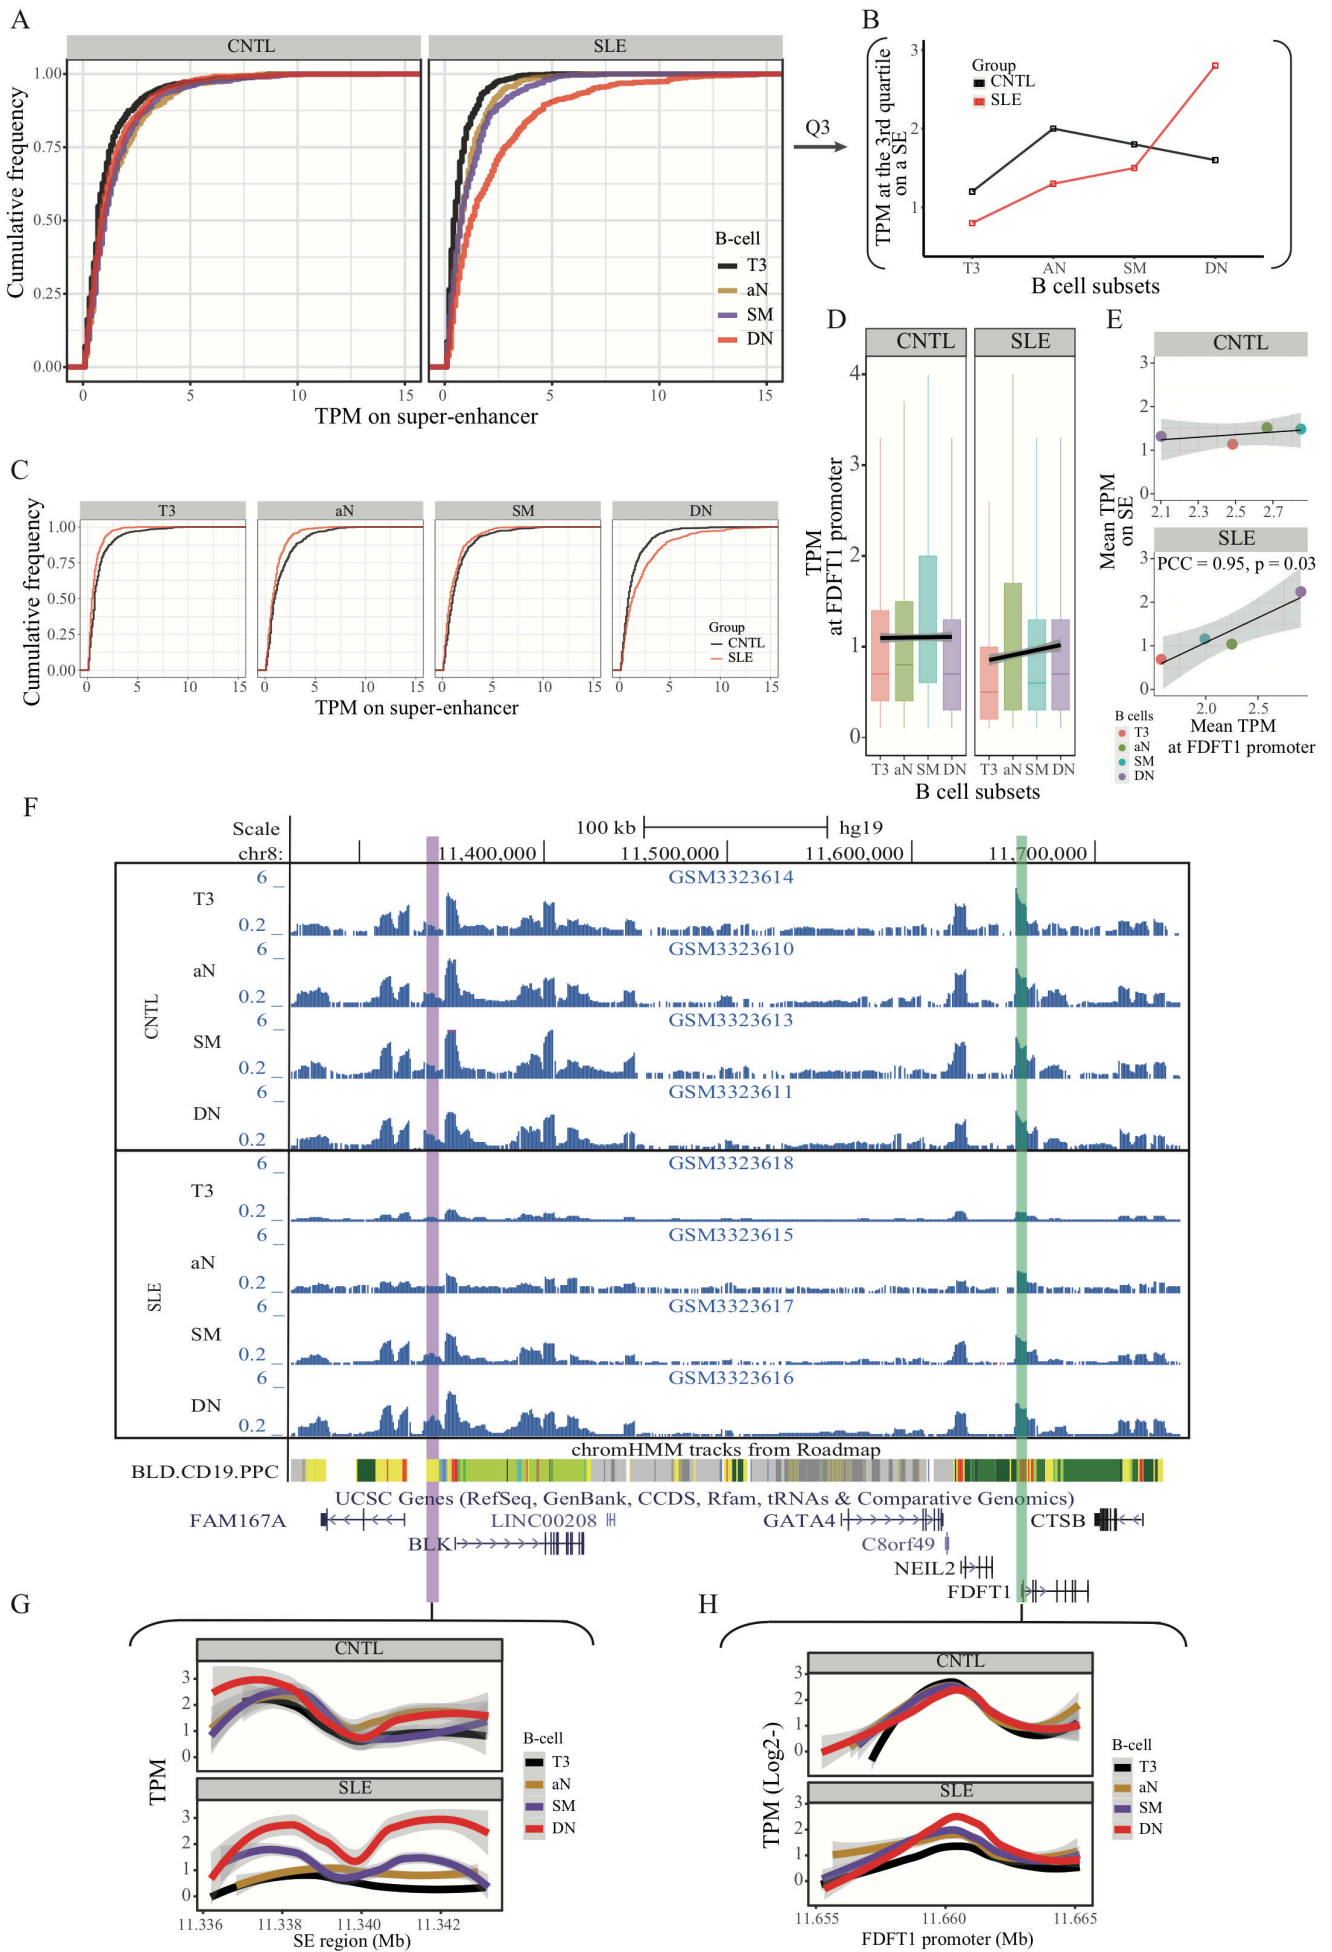

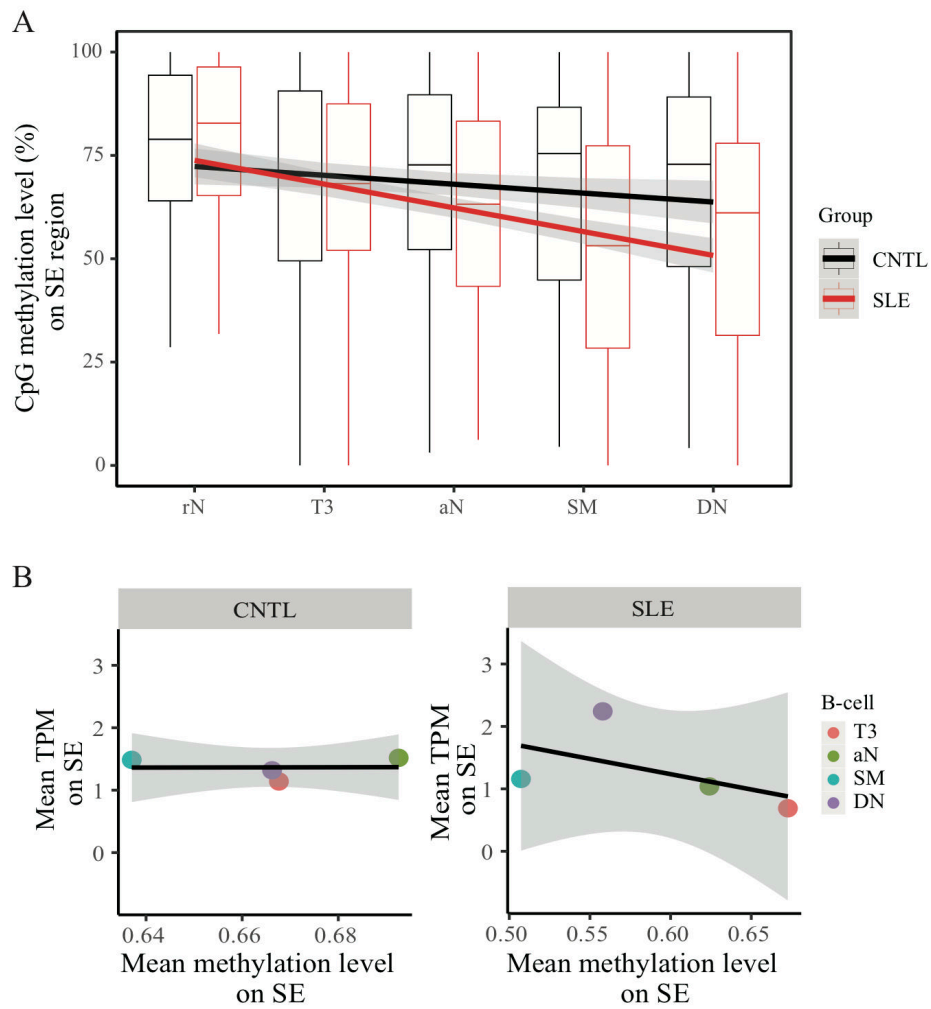

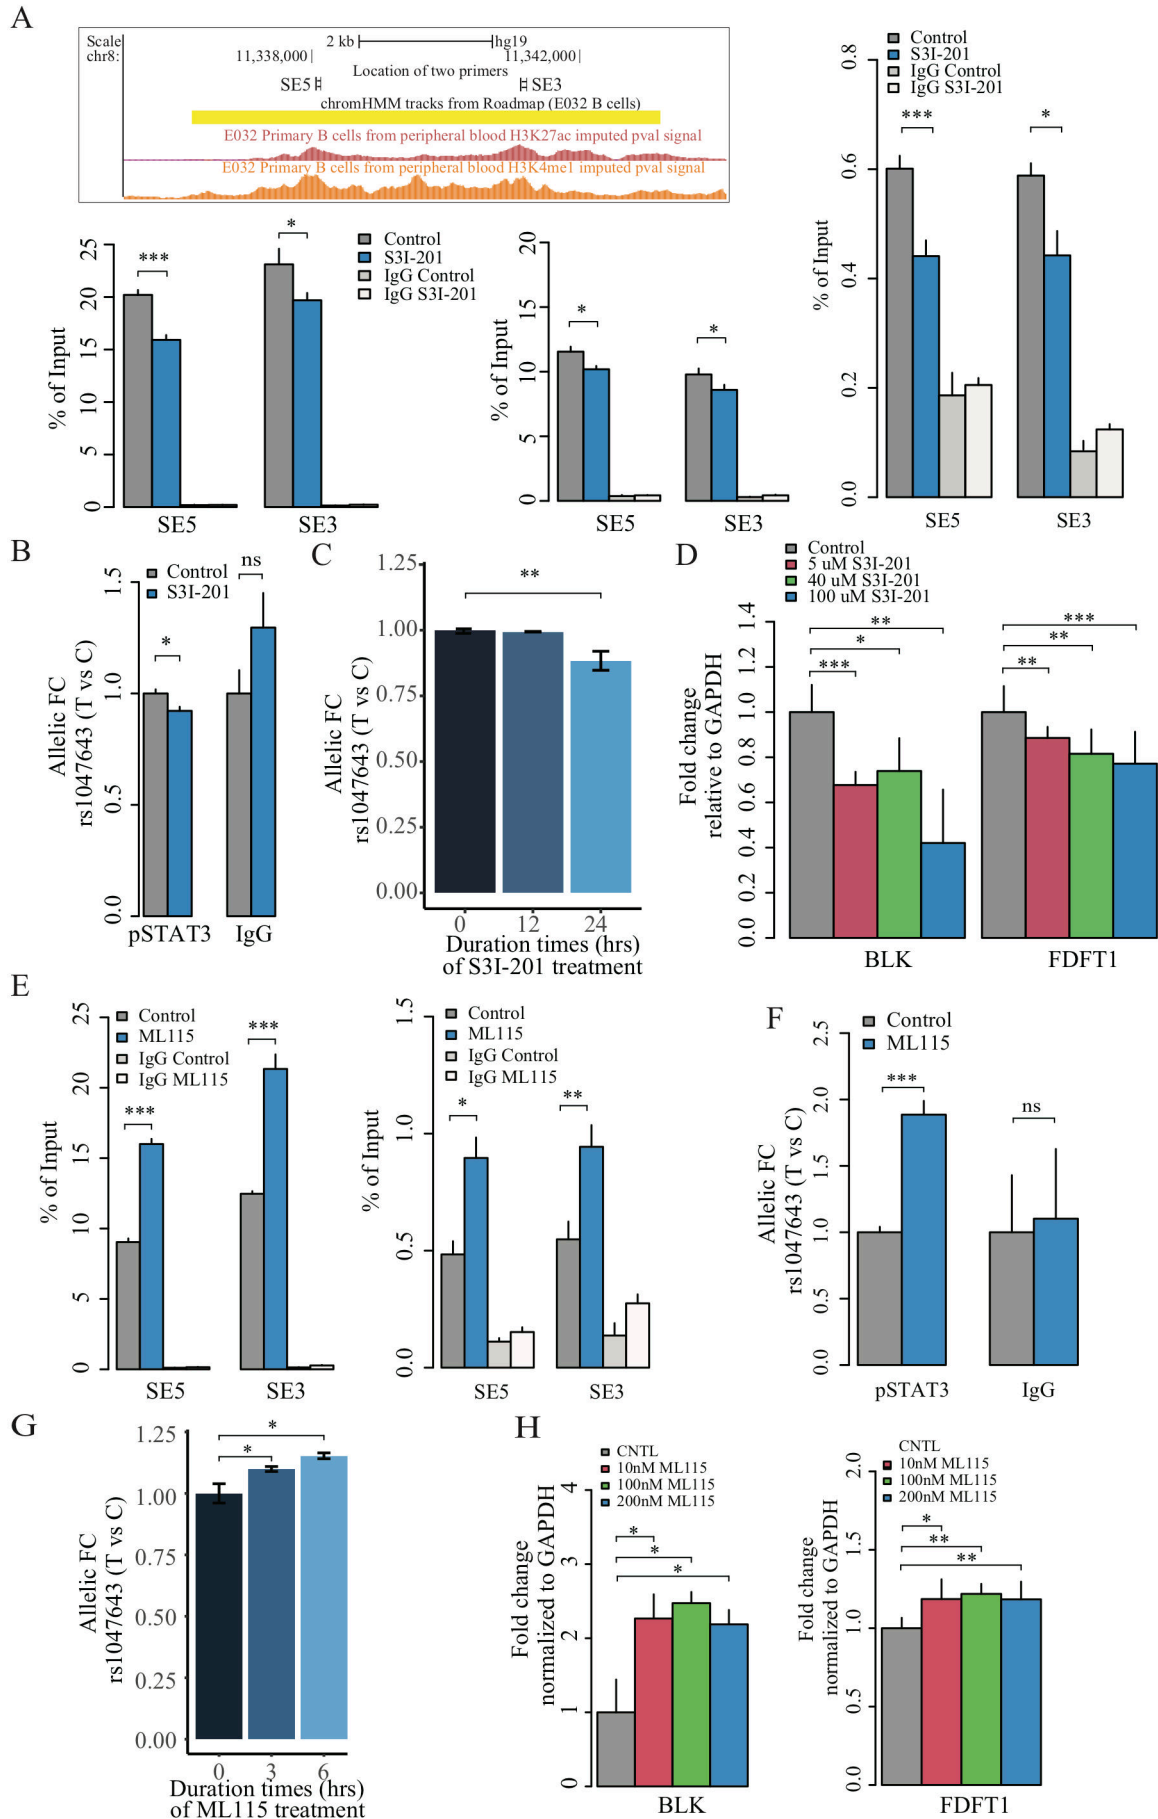



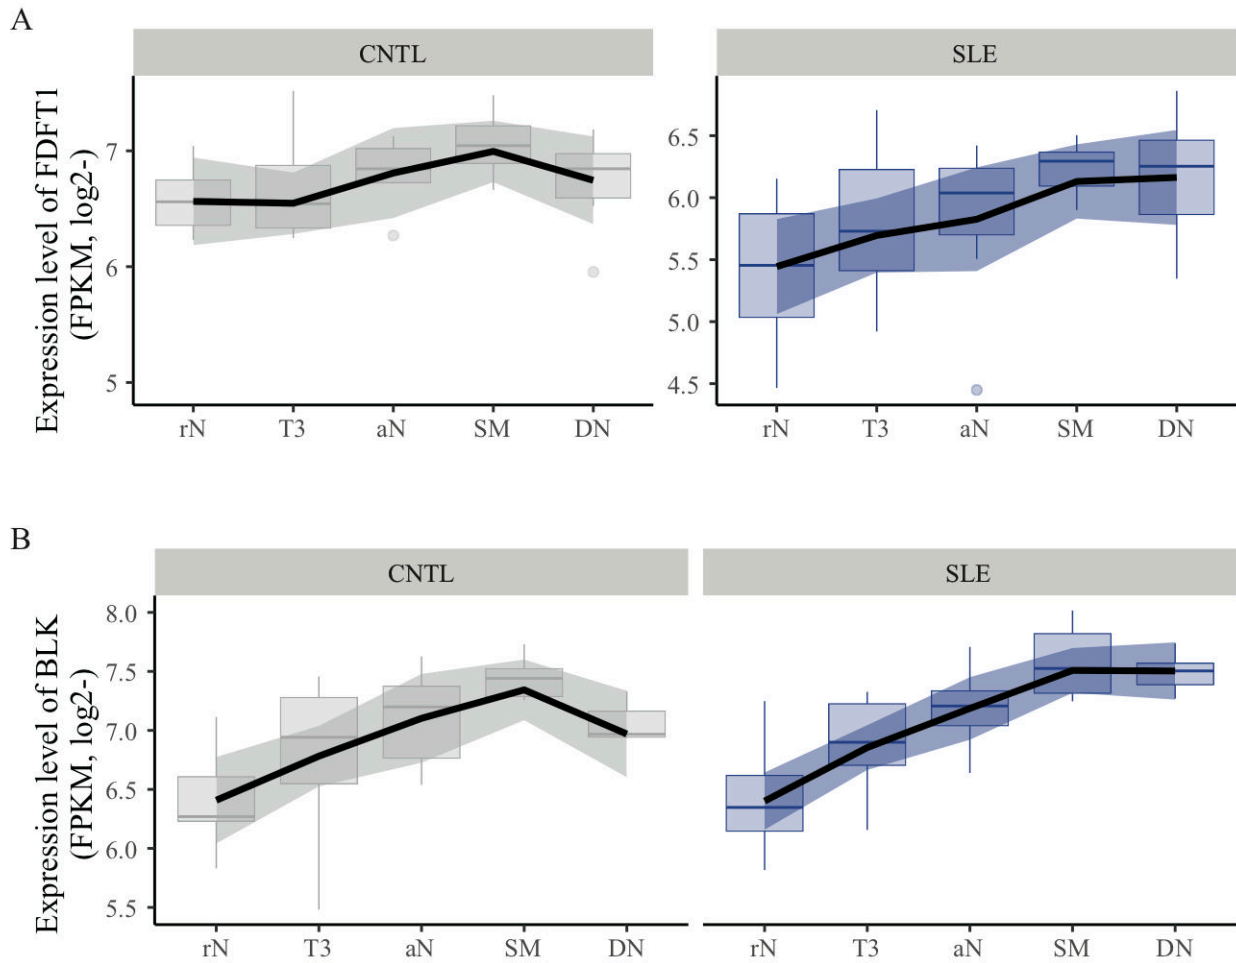

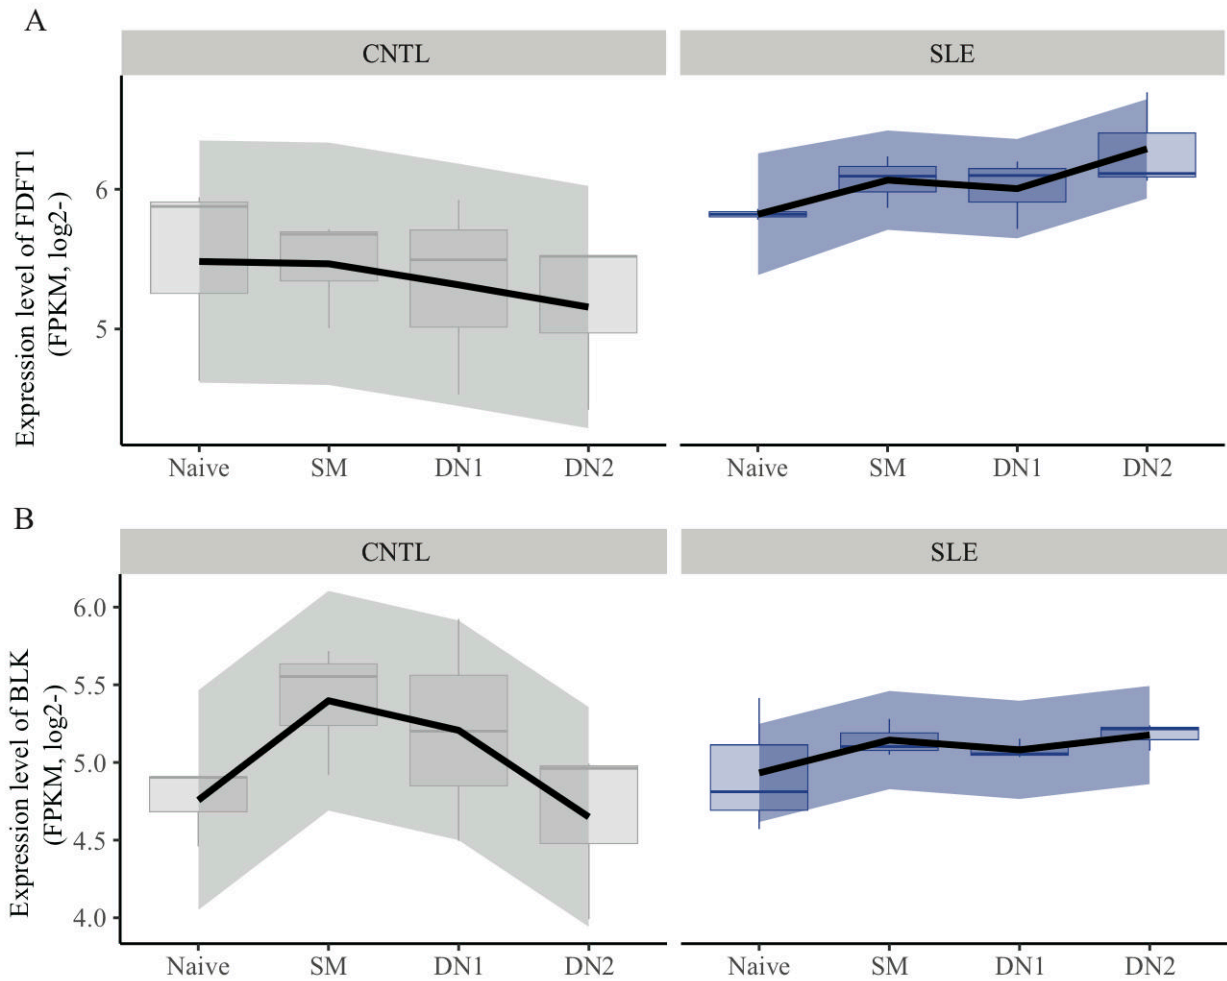



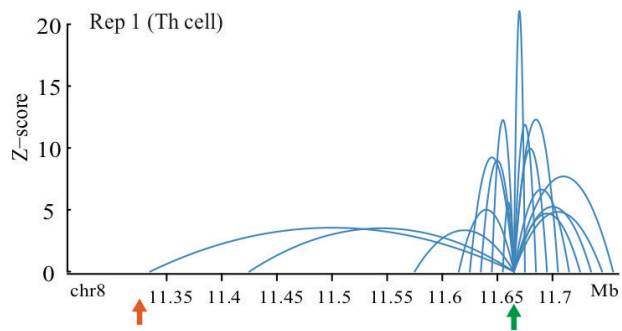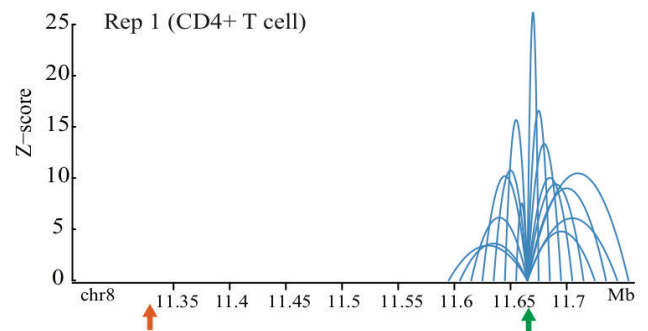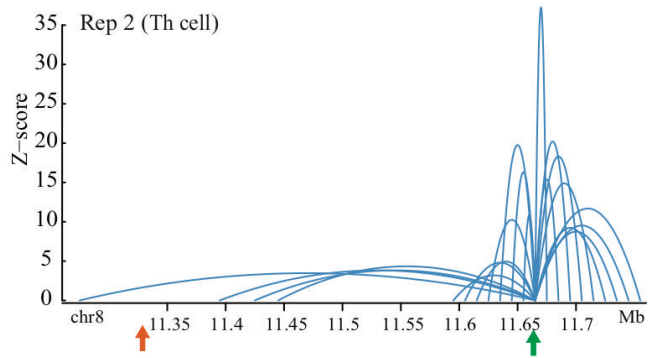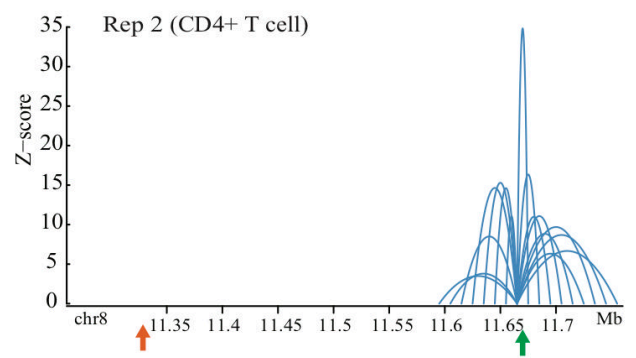

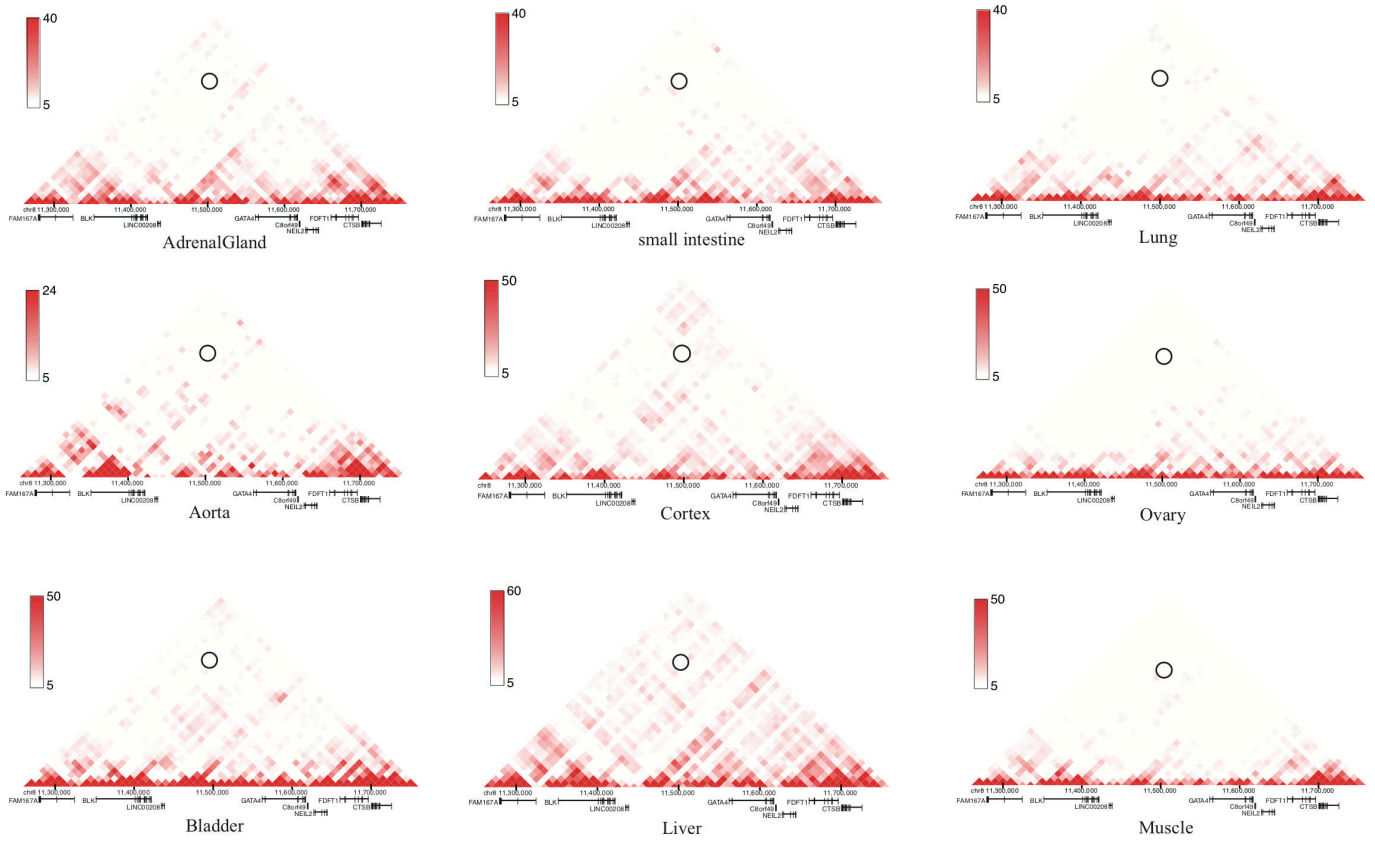

A

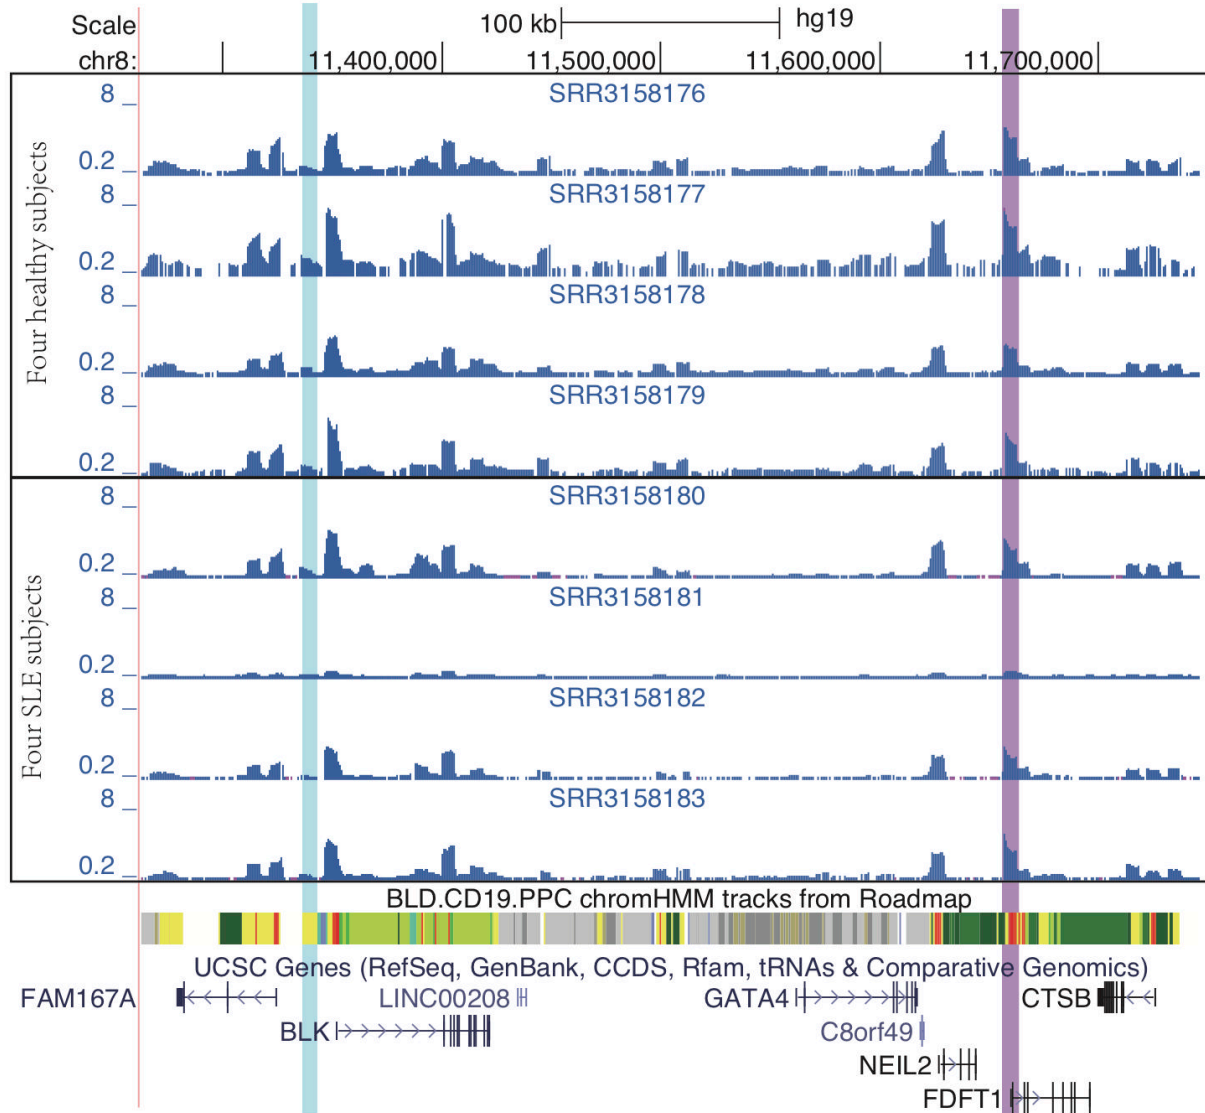

B

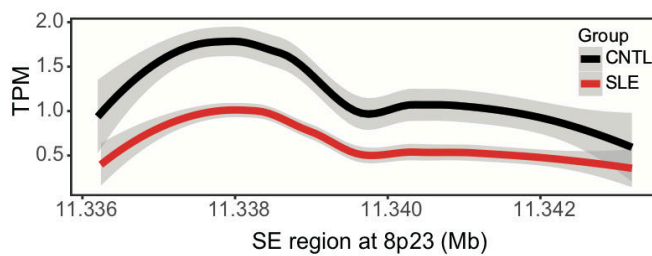

C

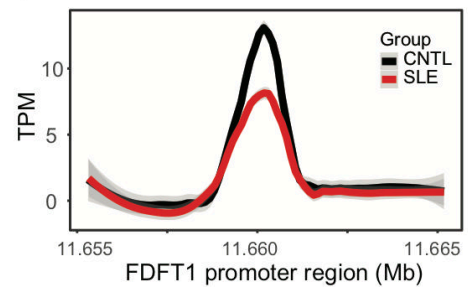

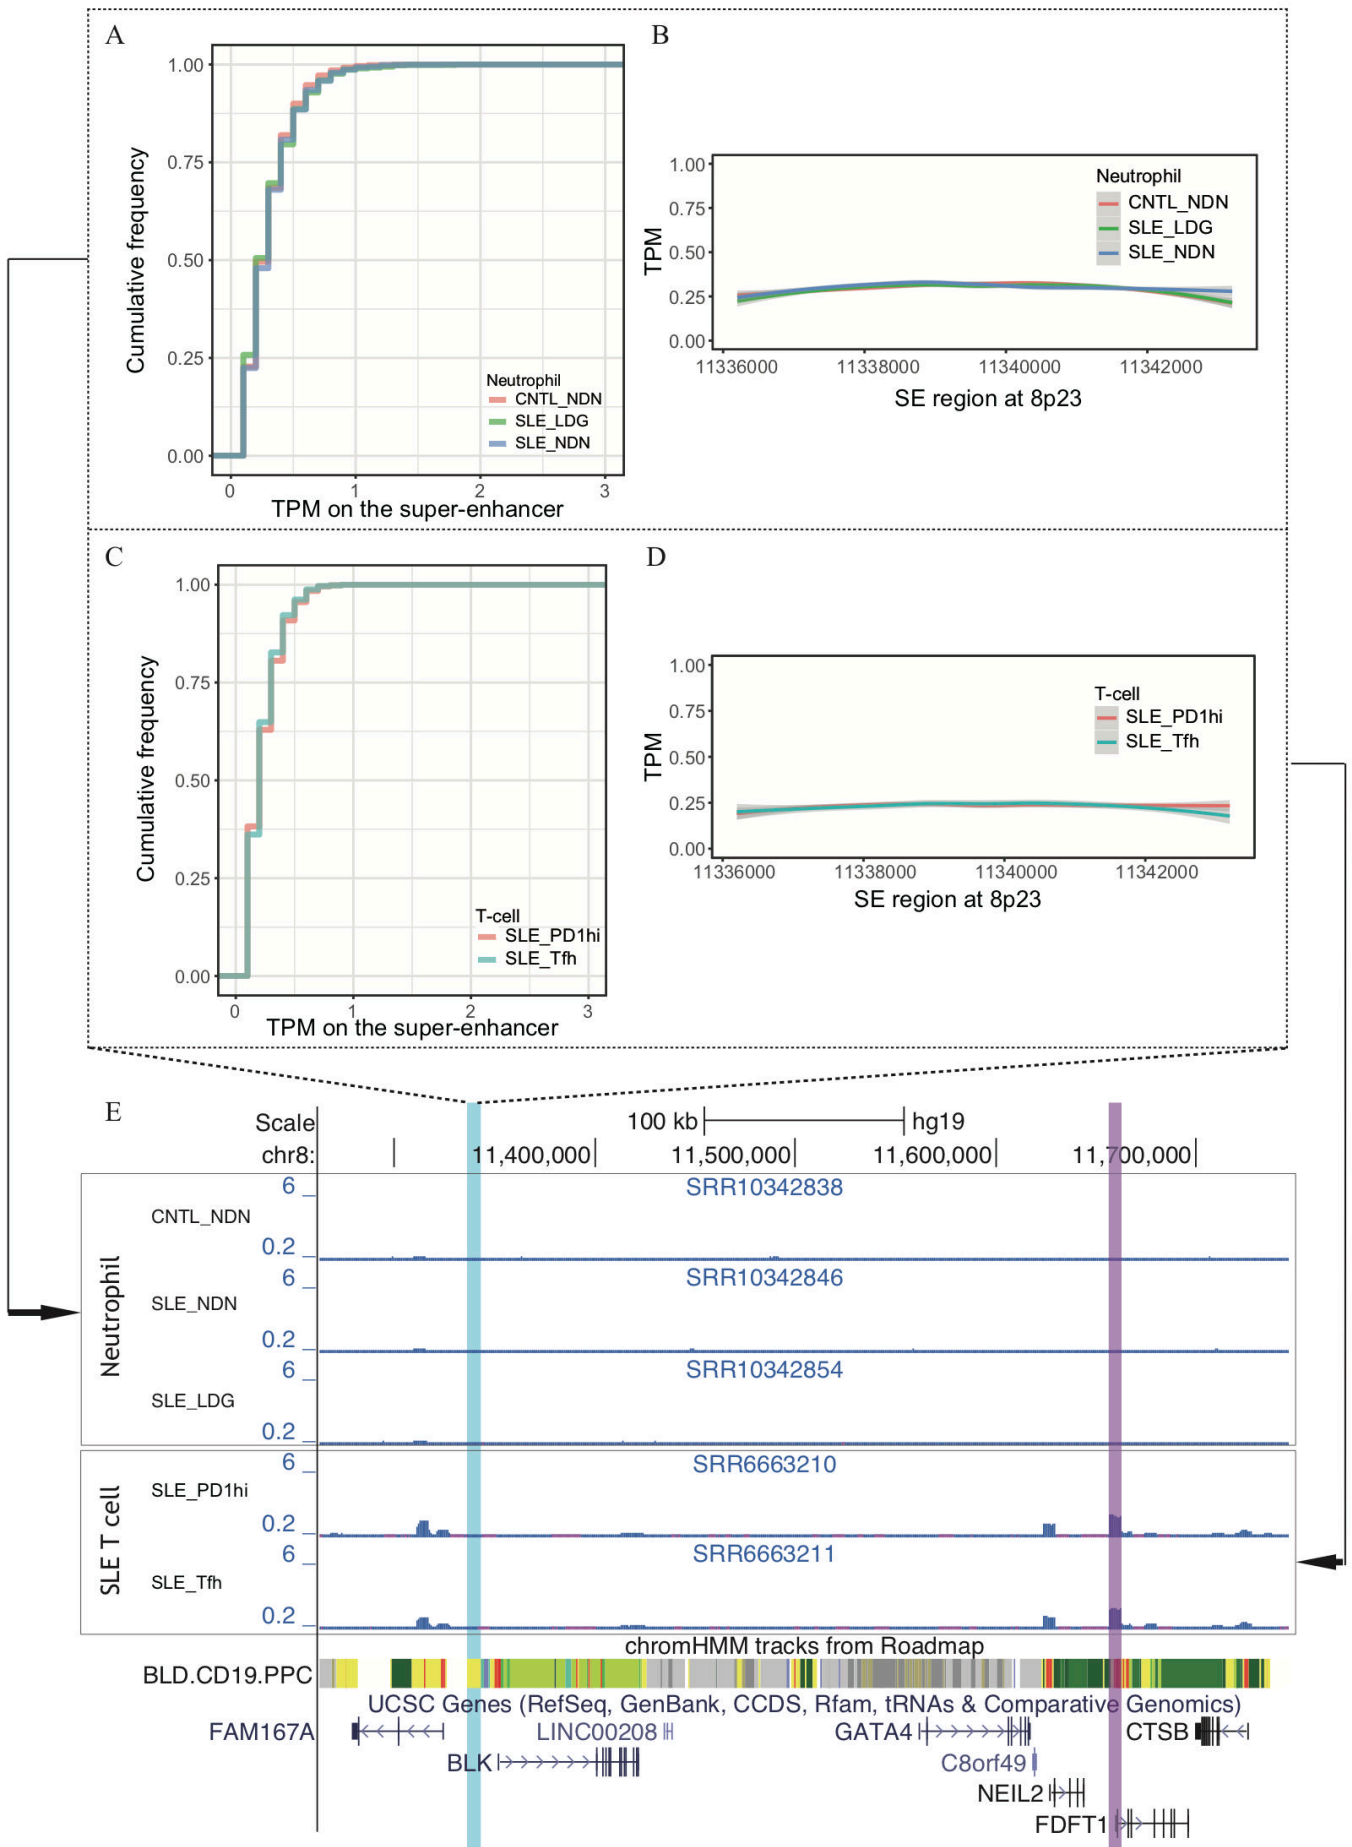

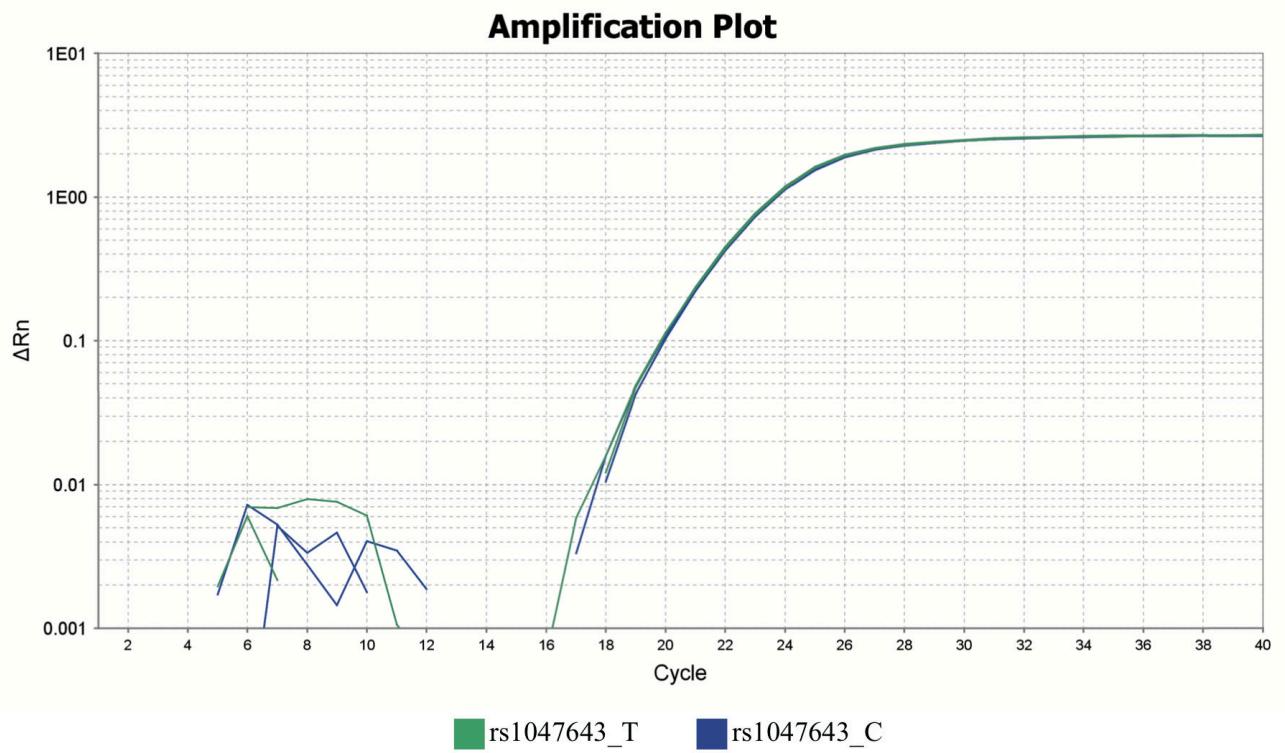

| Stage | Data set<br>(Accession ID) | Data description                                                     | Method   | Samples, n<br>(SLE vs<br>Control) | Main Purpose                                    |
|-------|----------------------------|----------------------------------------------------------------------|----------|-----------------------------------|-------------------------------------------------|
| I     | GSE118253                  | ATAC-Seq data in B cell subsets from a SLE case-control study        | ATAC-seq | 41 (14 vs 27)                     | Allelic imbalance analysis                      |
|       | GSE71338                   | ATAC-Seq data in naive B cells from a SLE case-control study         | ATAC-seq | 8 (4 vs 4)                        | Allelic imbalance analysis                      |
| II    | GSE139359                  | ATAC-Seq data in Neutrophil cells from a SLE case-control study      | ATAC-seq | 24 (16 vs 8)                      | Quantitative analysis of open chromatin regions |
|       | GSE110017                  | ATAC-Seq data in two T cell subsets from a SLE study                 | ATAC-seq | 6 (6 vs 0)                        | Quantitative analysis of open chromatin regions |
|       | GSE118254                  | Transcriptomic data in B cell subsets from a SLE case-control study  | RNA-seq  | 76 (42 vs 34)                     | Allelic expression analysis                     |
|       | GSE92387                   | Transcriptomic data in B cell subsets from a SLE case-control study  | RNA-seq  | 24 (12 vs 12)                     | Gene expression analysis                        |
|       | GSE118255                  | DNA methylation data in B cell subsets from a SLE case-control study | RRBS-seq | 85 (45 vs 40)                     | DNA methylation analysis                        |
|       | GSE63525                   | Long-range chromatin interaction data on seven human cell types      | Hi-C     | 7                                 | Chromatin looping analysis                      |
|       | GSE113405                  | Long-range chromatin interaction data in HepG2 cells                 | Hi-C     | 1                                 | Chromatin looping analysis                      |

|              |                                                                         |                      |                    |                            |
|--------------|-------------------------------------------------------------------------|----------------------|--------------------|----------------------------|
| GSE81503     | DNA Looping Interactions in Capture Hi-C data in GM12878 cells          | Capture Hi-C (CHi-C) | 1                  | Chromatin looping analysis |
| E-MTAB-6621  | DNA Looping Interactions in Capture Hi-C data in Tonsil-derived T-cells | Capture Hi-C (CHi-C) | 6                  | Chromatin looping analysis |
| phs001025.v1 | Hispanic Lupus GWAS Study                                               | Microarray           | 2279 (1393 vs 886) | SNP association analysis   |

---

| <b>GSE ID</b> | <b>GSM ID</b> | <b>Group</b> | <b>Assay Type</b> | <b>Cell type</b>              |
|---------------|---------------|--------------|-------------------|-------------------------------|
| GSE118253     | GSM3323580    | CNTL         | ATAC-seq          | Activated Naive B cells (aN)  |
| GSE118253     | GSM3323581    | CNTL         | ATAC-seq          | Double negative B cells (DN2) |
| GSE118253     | GSM3323583    | CNTL         | ATAC-seq          | Resting Naive B cells (rN)    |
| GSE118253     | GSM3323584    | CNTL         | ATAC-seq          | Switched Memory B cells (SM)  |
| GSE118253     | GSM3323585    | CNTL         | ATAC-seq          | Transitional 3 B cells (T3)   |
| GSE118253     | GSM3323586    | CNTL         | ATAC-seq          | Double negative B cells (DN2) |
| GSE118253     | GSM3323588    | CNTL         | ATAC-seq          | Resting Naive B cells (rN)    |
| GSE118253     | GSM3323589    | CNTL         | ATAC-seq          | Activated Naive B cells (aN)  |
| GSE118253     | GSM3323590    | CNTL         | ATAC-seq          | Double negative B cells (DN2) |
| GSE118253     | GSM3323592    | CNTL         | ATAC-seq          | Resting Naive B cells (rN)    |
| GSE118253     | GSM3323593    | CNTL         | ATAC-seq          | Switched Memory B cells (SM)  |
| GSE118253     | GSM3323594    | CNTL         | ATAC-seq          | Transitional 3 B cells (T3)   |
| GSE118253     | GSM3323596    | CNTL         | ATAC-seq          | Resting Naive B cells (rN)    |
| GSE118253     | GSM3323597    | CNTL         | ATAC-seq          | Transitional 3 B cells (T3)   |
| GSE118253     | GSM3323598    | CNTL         | ATAC-seq          | Double negative B cells (DN2) |
| GSE118253     | GSM3323600    | CNTL         | ATAC-seq          | Switched Memory B cells (SM)  |
| GSE118253     | GSM3323601    | CNTL         | ATAC-seq          | Transitional 3 B cells (T3)   |
| GSE118253     | GSM3323602    | CNTL         | ATAC-seq          | Activated Naive B cells (aN)  |
| GSE118253     | GSM3323604    | CNTL         | ATAC-seq          | Switched Memory B cells (SM)  |
| GSE118253     | GSM3323605    | CNTL         | ATAC-seq          | Transitional 3 B cells (T3)   |
| GSE118253     | GSM3323606    | CNTL         | ATAC-seq          | Double negative B cells (DN2) |
| GSE118253     | GSM3323608    | CNTL         | ATAC-seq          | Switched Memory B cells (SM)  |
| GSE118253     | GSM3323609    | CNTL         | ATAC-seq          | Transitional 3 B cells (T3)   |
| GSE118253     | GSM3323610    | CNTL         | ATAC-seq          | Activated Naive B cells (aN)  |
| GSE118253     | GSM3323611    | CNTL         | ATAC-seq          | Double negative B cells (DN2) |
| GSE118253     | GSM3323613    | CNTL         | ATAC-seq          | Switched Memory B cells (SM)  |
| GSE118253     | GSM3323614    | CNTL         | ATAC-seq          | Transitional 3 B cells (T3)   |
| GSE118253     | GSM3323615    | SLE          | ATAC-seq          | Activated Naive B cells (aN)  |
| GSE118253     | GSM3323616    | SLE          | ATAC-seq          | Double negative B cells (DN2) |
| GSE118253     | GSM3323617    | SLE          | ATAC-seq          | Switched Memory B cells (SM)  |



|           |            |         |          |                               |
|-----------|------------|---------|----------|-------------------------------|
| GSE118253 | GSM3323618 | SLE     | ATAC-seq | Transitional 3 B cells (T3)   |
| GSE118253 | GSM3323619 | SLE     | ATAC-seq | Activated Naive B cells (aN)  |
| GSE118253 | GSM3323620 | SLE     | ATAC-seq | Double negative B cells (DN2) |
| GSE118253 | GSM3323621 | SLE     | ATAC-seq | Switched Memory B cells (SM)  |
| GSE118253 | GSM3323622 | SLE     | ATAC-seq | Transitional 3 B cells (T3)   |
| GSE118253 | GSM3323623 | SLE     | ATAC-seq | Double negative B cells (DN2) |
| GSE118253 | GSM3323624 | SLE     | ATAC-seq | Switched Memory B cells (SM)  |
| GSE118253 | GSM3323625 | SLE     | ATAC-seq | Activated Naive B cells (aN)  |
| GSE118253 | GSM3323626 | SLE     | ATAC-seq | Double negative B cells (DN2) |
| GSE118253 | GSM3323628 | SLE     | ATAC-seq | Switched Memory B cells (SM)  |
| GSE118253 | GSM3323629 | SLE     | ATAC-seq | Transitional 3 B cells (T3)   |
| GSE71338  | GSM2058522 | CNTL    | ATAC-Seq | Naive B cell                  |
| GSE71338  | GSM2058523 | CNTL    | ATAC-Seq | Naive B cell                  |
| GSE71338  | GSM2058524 | CNTL    | ATAC-Seq | Naive B cell                  |
| GSE71338  | GSM2058525 | CNTL    | ATAC-Seq | Naive B cell                  |
| GSE71338  | GSM2058526 | SLE     | ATAC-Seq | Naive B cell                  |
| GSE71338  | GSM2058527 | SLE     | ATAC-Seq | Naive B cell                  |
| GSE71338  | GSM2058528 | SLE     | ATAC-Seq | Naive B cell                  |
| GSE71338  | GSM2058529 | SLE     | ATAC-Seq | Naive B cell                  |
| GSE118254 | GSM3323630 | Control | RNA-Seq  | Activated Naive B cells (aN)  |
| GSE118254 | GSM3323631 | Control | RNA-Seq  | Double negative B cells (DN2) |
| GSE118254 | GSM3323632 | Control | RNA-Seq  | Switched Memory B cells (SM)  |
| GSE118254 | GSM3323633 | Control | RNA-Seq  | Transitional 3 B cells (T3)   |
| GSE118254 | GSM3323634 | Control | RNA-Seq  | Resting Naive B cells (rN)    |
| GSE118254 | GSM3323635 | Control | RNA-Seq  | Switched Memory B cells (SM)  |
| GSE118254 | GSM3323636 | Control | RNA-Seq  | Transitional 3 B cells (T3)   |
| GSE118254 | GSM3323637 | Control | RNA-Seq  | Double negative B cells (DN2) |
| GSE118254 | GSM3323638 | Control | RNA-Seq  | Resting Naive B cells (rN)    |
| GSE118254 | GSM3323639 | Control | RNA-Seq  | Switched Memory B cells (SM)  |
| GSE118254 | GSM3323640 | Control | RNA-Seq  | Transitional 3 B cells (T3)   |
| GSE118254 | GSM3323641 | Control | RNA-Seq  | Activated Naive B cells (aN)  |

|           |            |         |         |                               |
|-----------|------------|---------|---------|-------------------------------|
| GSE118254 | GSM3323642 | Control | RNA-Seq | Double negative B cells (DN2) |
| GSE118254 | GSM3323644 | Control | RNA-Seq | Resting Naive B cells (rN)    |
| GSE118254 | GSM3323645 | Control | RNA-Seq | Switched Memory B cells (SM)  |
| GSE118254 | GSM3323646 | Control | RNA-Seq | Transitional 3 B cells (T3)   |
| GSE118254 | GSM3323647 | Control | RNA-Seq | Activated Naive B cells (aN)  |
| GSE118254 | GSM3323648 | Control | RNA-Seq | Switched Memory B cells (SM)  |
| GSE118254 | GSM3323649 | Control | RNA-Seq | Transitional 3 B cells (T3)   |
| GSE118254 | GSM3323650 | Control | RNA-Seq | Activated Naive B cells (aN)  |
| GSE118254 | GSM3323651 | Control | RNA-Seq | Double negative B cells (DN2) |
| GSE118254 | GSM3323652 | Control | RNA-Seq | Resting Naive B cells (rN)    |
| GSE118254 | GSM3323653 | Control | RNA-Seq | Switched Memory B cells (SM)  |
| GSE118254 | GSM3323654 | Control | RNA-Seq | Transitional 3 B cells (T3)   |
| GSE118254 | GSM3323655 | Control | RNA-Seq | Activated Naive B cells (aN)  |
| GSE118254 | GSM3323656 | Control | RNA-Seq | Double negative B cells (DN2) |
| GSE118254 | GSM3323658 | Control | RNA-Seq | Resting Naive B cells (rN)    |
| GSE118254 | GSM3323660 | Control | RNA-Seq | Transitional 3 B cells (T3)   |
| GSE118254 | GSM3323659 | Control | RNA-Seq | Switched Memory B cells (SM)  |
| GSE118254 | GSM3323661 | Control | RNA-Seq | Activated Naive B cells (aN)  |
| GSE118254 | GSM3323662 | Control | RNA-Seq | Double negative B cells (DN2) |
| GSE118254 | GSM3323664 | Control | RNA-Seq | Resting Naive B cells (rN)    |
| GSE118254 | GSM3323665 | Control | RNA-Seq | Switched Memory B cells (SM)  |
| GSE118254 | GSM3323666 | Control | RNA-Seq | Transitional 3 B cells (T3)   |
| GSE118254 | GSM3323667 | SLE     | RNA-Seq | Activated Naive B cells (aN)  |
| GSE118254 | GSM3323668 | SLE     | RNA-Seq | Double negative B cells (DN2) |
| GSE118254 | GSM3323670 | SLE     | RNA-Seq | Resting Naive B cells (rN)    |
| GSE118254 | GSM3323671 | SLE     | RNA-Seq | Switched Memory B cells (SM)  |
| GSE118254 | GSM3323672 | SLE     | RNA-Seq | Transitional 3 B cells (T3)   |
| GSE118254 | GSM3323673 | SLE     | RNA-Seq | Activated Naive B cells (aN)  |
| GSE118254 | GSM3323674 | SLE     | RNA-Seq | Double negative B cells (DN2) |
| GSE118254 | GSM3323675 | SLE     | RNA-Seq | Resting Naive B cells (rN)    |
| GSE118254 | GSM3323676 | SLE     | RNA-Seq | Switched Memory B cells (SM)  |

|           |            |     |         |                               |
|-----------|------------|-----|---------|-------------------------------|
| GSE118254 | GSM3323677 | SLE | RNA-Seq | Transitional 3 B cells (T3)   |
| GSE118254 | GSM3323678 | SLE | RNA-Seq | Activated Naive B cells (aN)  |
| GSE118254 | GSM3323679 | SLE | RNA-Seq | Double negative B cells (DN2) |
| GSE118254 | GSM3323681 | SLE | RNA-Seq | Resting Naive B cells (rN)    |
| GSE118254 | GSM3323682 | SLE | RNA-Seq | Switched Memory B cells (SM)  |
| GSE118254 | GSM3323683 | SLE | RNA-Seq | Transitional 3 B cells (T3)   |
| GSE118254 | GSM3323684 | SLE | RNA-Seq | Activated Naive B cells (aN)  |
| GSE118254 | GSM3323685 | SLE | RNA-Seq | Double negative B cells (DN2) |
| GSE118254 | GSM3323688 | SLE | RNA-Seq | Switched Memory B cells (SM)  |
| GSE118254 | GSM3323687 | SLE | RNA-Seq | Resting Naive B cells (rN)    |
| GSE118254 | GSM3323689 | SLE | RNA-Seq | Transitional 3 B cells (T3)   |
| GSE118254 | GSM3323690 | SLE | RNA-Seq | Activated Naive B cells (aN)  |
| GSE118254 | GSM3323691 | SLE | RNA-Seq | Double negative B cells (DN2) |
| GSE118254 | GSM3323692 | SLE | RNA-Seq | Resting Naive B cells (rN)    |
| GSE118254 | GSM3323694 | SLE | RNA-Seq | Transitional 3 B cells (T3)   |
| GSE118254 | GSM3323693 | SLE | RNA-Seq | Switched Memory B cells (SM)  |
| GSE118254 | GSM3323695 | SLE | RNA-Seq | Switched Memory B cells (SM)  |
| GSE118254 | GSM3323696 | SLE | RNA-Seq | Transitional 3 B cells (T3)   |
| GSE118254 | GSM3323697 | SLE | RNA-Seq | Activated Naive B cells (aN)  |
| GSE118254 | GSM3323699 | SLE | RNA-Seq | Resting Naive B cells (rN)    |
| GSE118254 | GSM3323698 | SLE | RNA-Seq | Double negative B cells (DN2) |
| GSE118254 | GSM3323700 | SLE | RNA-Seq | Switched Memory B cells (SM)  |
| GSE118254 | GSM3323701 | SLE | RNA-Seq | Transitional 3 B cells (T3)   |
| GSE118254 | GSM3323702 | SLE | RNA-Seq | Double negative B cells (DN2) |
| GSE118254 | GSM3323704 | SLE | RNA-Seq | Switched Memory B cells (SM)  |
| GSE118254 | GSM3323703 | SLE | RNA-Seq | Resting Naive B cells (rN)    |
| GSE118254 | GSM3323705 | SLE | RNA-Seq | Transitional 3 B cells (T3)   |
| GSE118254 | GSM3323706 | SLE | RNA-Seq | Resting Naive B cells (rN)    |
| GSE118254 | GSM3323707 | SLE | RNA-Seq | Activated Naive B cells (aN)  |
| GSE118254 | GSM3323708 | SLE | RNA-Seq | Double negative B cells (DN2) |
| GSE118254 | GSM3323710 | SLE | RNA-Seq | Resting Naive B cells (rN)    |

|           |            |      |          |                              |
|-----------|------------|------|----------|------------------------------|
| GSE118254 | GSM3323711 | SLE  | RNA-Seq  | Switched Memory B cells (SM) |
| GSE118254 | GSM3323712 | SLE  | RNA-Seq  | Transitional 3 B cells (T3)  |
| GSE92387  | GSM2428862 | SLE  | RNA-Seq  | Naïve B cell                 |
| GSE92387  | GSM2428863 | SLE  | RNA-Seq  | Switched memory              |
| GSE92387  | GSM2428864 | SLE  | RNA-Seq  | Double negative 1            |
| GSE92387  | GSM2428865 | SLE  | RNA-Seq  | Double negative 2            |
| GSE92387  | GSM2428866 | SLE  | RNA-Seq  | Naïve                        |
| GSE92387  | GSM2428867 | SLE  | RNA-Seq  | Switched memory              |
| GSE92387  | GSM2428868 | SLE  | RNA-Seq  | Double negative 1            |
| GSE92387  | GSM2428869 | SLE  | RNA-Seq  | Double negative 2            |
| GSE92387  | GSM2428870 | SLE  | RNA-Seq  | Naïve                        |
| GSE92387  | GSM2428871 | SLE  | RNA-Seq  | Switched memory              |
| GSE92387  | GSM2428872 | SLE  | RNA-Seq  | Double negative 1            |
| GSE92387  | GSM2428873 | SLE  | RNA-Seq  | Double negative 2            |
| GSE92387  | GSM2428874 | CNTL | RNA-Seq  | Naïve                        |
| GSE92387  | GSM2428875 | CNTL | RNA-Seq  | Switched memory              |
| GSE92387  | GSM2428876 | CNTL | RNA-Seq  | Double negative 1            |
| GSE92387  | GSM2428877 | CNTL | RNA-Seq  | Double negative 2            |
| GSE92387  | GSM2428878 | CNTL | RNA-Seq  | Naïve                        |
| GSE92387  | GSM2428879 | CNTL | RNA-Seq  | Switched memory              |
| GSE92387  | GSM2428880 | CNTL | RNA-Seq  | Double negative 1            |
| GSE92387  | GSM2428881 | CNTL | RNA-Seq  | Double negative 2            |
| GSE92387  | GSM2428882 | CNTL | RNA-Seq  | Naïve                        |
| GSE92387  | GSM2428883 | CNTL | RNA-Seq  | Switched memory              |
| GSE92387  | GSM2428884 | CNTL | RNA-Seq  | Double negative 1            |
| GSE92387  | GSM2428885 | CNTL | RNA-Seq  | Double negative 2            |
| GSE139359 | GSM4138735 | CNTL | ATAC-seq | NDN                          |
| GSE139359 | GSM4138736 | CNTL | ATAC-seq | NDN                          |
| GSE139359 | GSM4138737 | CNTL | ATAC-seq | NDN                          |
| GSE139359 | GSM4138738 | CNTL | ATAC-seq | NDN                          |
| GSE139359 | GSM4138739 | CNTL | ATAC-seq | NDN                          |

|           |            |      |          |                               |
|-----------|------------|------|----------|-------------------------------|
| GSE139359 | GSM4138740 | CNTL | ATAC-seq | NDN                           |
| GSE139359 | GSM4138741 | CNTL | ATAC-seq | NDN                           |
| GSE139359 | GSM4138742 | CNTL | ATAC-seq | NDN                           |
| GSE139359 | GSM4138743 | SLE  | ATAC-seq | NDN                           |
| GSE139359 | GSM4138744 | SLE  | ATAC-seq | NDN                           |
| GSE139359 | GSM4138745 | SLE  | ATAC-seq | NDN                           |
| GSE139359 | GSM4138746 | SLE  | ATAC-seq | NDN                           |
| GSE139359 | GSM4138747 | SLE  | ATAC-seq | NDN                           |
| GSE139359 | GSM4138748 | SLE  | ATAC-seq | NDN                           |
| GSE139359 | GSM4138749 | SLE  | ATAC-seq | NDN                           |
| GSE139359 | GSM4138750 | SLE  | ATAC-seq | NDN                           |
| GSE139359 | GSM4138751 | SLE  | ATAC-seq | LDG                           |
| GSE139359 | GSM4138752 | SLE  | ATAC-seq | LDG                           |
| GSE139359 | GSM4138753 | SLE  | ATAC-seq | LDG                           |
| GSE139359 | GSM4138754 | SLE  | ATAC-seq | LDG                           |
| GSE139359 | GSM4138755 | SLE  | ATAC-seq | LDG                           |
| GSE139359 | GSM4138756 | SLE  | ATAC-seq | LDG                           |
| GSE139359 | GSM4138757 | SLE  | ATAC-seq | LDG                           |
| GSE139359 | GSM4138758 | SLE  | ATAC-seq | LDG                           |
| GSE110017 | GSM2976426 | SLE  | ATAC-seq | CD4+ T (PD1hi)                |
| GSE110017 | GSM2976427 | SLE  | ATAC-seq | CD4+ T (Tfh)                  |
| GSE110017 | GSM2976428 | SLE  | ATAC-seq | CD4+ T (PD1hi)                |
| GSE110017 | GSM2976429 | SLE  | ATAC-seq | CD4+ T (PD1hi)                |
| GSE110017 | GSM2976430 | SLE  | ATAC-seq | CD4+ T (Tfh)                  |
| GSE110017 | GSM2976431 | SLE  | ATAC-seq | CD4+ T (PD1hi)                |
| GSE118255 | GSM3323713 | CNTL | RRBS     | Activated Naive B cells (aN)  |
| GSE118255 | GSM3323714 | CNTL | RRBS     | Double negative B cells (DN2) |
| GSE118255 | GSM3323715 | CNTL | RRBS     | Resting Naive B cells (rN)    |
| GSE118255 | GSM3323716 | CNTL | RRBS     | Switched Memory B cells (SM)  |
| GSE118255 | GSM3323717 | CNTL | RRBS     | Transitional 3 B cells (T3)   |
| GSE118255 | GSM3323718 | CNTL | RRBS     | Activated Naive B cells (aN)  |

|           |            |      |      |                               |
|-----------|------------|------|------|-------------------------------|
| GSE118255 | GSM3323719 | CNTL | RRBS | Double negative B cells (DN2) |
| GSE118255 | GSM3323720 | CNTL | RRBS | Resting Naive B cells (rN)    |
| GSE118255 | GSM3323721 | CNTL | RRBS | Switched Memory B cells (SM)  |
| GSE118255 | GSM3323722 | CNTL | RRBS | Transitional 3 B cells (T3)   |
| GSE118255 | GSM3323723 | CNTL | RRBS | Activated Naive B cells (aN)  |
| GSE118255 | GSM3323724 | CNTL | RRBS | Double negative B cells (DN2) |
| GSE118255 | GSM3323725 | CNTL | RRBS | Resting Naive B cells (rN)    |
| GSE118255 | GSM3323726 | CNTL | RRBS | Switched Memory B cells (SM)  |
| GSE118255 | GSM3323727 | CNTL | RRBS | Transitional 3 B cells (T3)   |
| GSE118255 | GSM3323728 | CNTL | RRBS | Activated Naive B cells (aN)  |
| GSE118255 | GSM3323729 | CNTL | RRBS | Double negative B cells (DN2) |
| GSE118255 | GSM3323730 | CNTL | RRBS | Resting Naive B cells (rN)    |
| GSE118255 | GSM3323731 | CNTL | RRBS | Switched Memory B cells (SM)  |
| GSE118255 | GSM3323732 | CNTL | RRBS | Transitional 3 B cells (T3)   |
| GSE118255 | GSM3323733 | CNTL | RRBS | Activated Naive B cells (aN)  |
| GSE118255 | GSM3323734 | CNTL | RRBS | Double negative B cells (DN2) |
| GSE118255 | GSM3323736 | CNTL | RRBS | Resting Naive B cells (rN)    |
| GSE118255 | GSM3323737 | CNTL | RRBS | Switched Memory B cells (SM)  |
| GSE118255 | GSM3323738 | CNTL | RRBS | Transitional 3 B cells (T3)   |
| GSE118255 | GSM3323739 | CNTL | RRBS | Activated Naive B cells (aN)  |
| GSE118255 | GSM3323740 | CNTL | RRBS | Double negative B cells (DN2) |
| GSE118255 | GSM3323741 | CNTL | RRBS | Resting Naive B cells (rN)    |
| GSE118255 | GSM3323742 | CNTL | RRBS | Switched Memory B cells (SM)  |
| GSE118255 | GSM3323743 | CNTL | RRBS | Transitional 3 B cells (T3)   |
| GSE118255 | GSM3323744 | CNTL | RRBS | Activated Naive B cells (aN)  |
| GSE118255 | GSM3323745 | CNTL | RRBS | Double negative B cells (DN2) |
| GSE118255 | GSM3323747 | CNTL | RRBS | Resting Naive B cells (rN)    |
| GSE118255 | GSM3323748 | CNTL | RRBS | Switched Memory B cells (SM)  |
| GSE118255 | GSM3323749 | CNTL | RRBS | Transitional 3 B cells (T3)   |
| GSE118255 | GSM3323750 | CNTL | RRBS | Activated Naive B cells (aN)  |
| GSE118255 | GSM3323751 | CNTL | RRBS | Double negative B cells (DN2) |

|           |            |      |      |                               |
|-----------|------------|------|------|-------------------------------|
| GSE118255 | GSM3323753 | CNTL | RRBS | Resting Naive B cells (rN)    |
| GSE118255 | GSM3323754 | CNTL | RRBS | Switched Memory B cells (SM)  |
| GSE118255 | GSM3323755 | CNTL | RRBS | Transitional 3 B cells (T3)   |
| GSE118255 | GSM3323756 | SLE  | RRBS | Activated Naive B cells (aN)  |
| GSE118255 | GSM3323757 | SLE  | RRBS | Double negative B cells (DN2) |
| GSE118255 | GSM3323758 | SLE  | RRBS | Resting Naive B cells (rN)    |
| GSE118255 | GSM3323759 | SLE  | RRBS | Switched Memory B cells (SM)  |
| GSE118255 | GSM3323760 | SLE  | RRBS | Transitional 3 B cells (T3)   |
| GSE118255 | GSM3323761 | SLE  | RRBS | Activated Naive B cells (aN)  |
| GSE118255 | GSM3323762 | SLE  | RRBS | Double negative B cells (DN2) |
| GSE118255 | GSM3323763 | SLE  | RRBS | Resting Naive B cells (rN)    |
| GSE118255 | GSM3323764 | SLE  | RRBS | Switched Memory B cells (SM)  |
| GSE118255 | GSM3323765 | SLE  | RRBS | Transitional 3 B cells (T3)   |
| GSE118255 | GSM3323766 | SLE  | RRBS | Activated Naive B cells (aN)  |
| GSE118255 | GSM3323767 | SLE  | RRBS | Double negative B cells (DN2) |
| GSE118255 | GSM3323768 | SLE  | RRBS | Resting Naive B cells (rN)    |
| GSE118255 | GSM3323769 | SLE  | RRBS | Switched Memory B cells (SM)  |
| GSE118255 | GSM3323770 | SLE  | RRBS | Transitional 3 B cells (T3)   |
| GSE118255 | GSM3323771 | SLE  | RRBS | Activated Naive B cells (aN)  |
| GSE118255 | GSM3323772 | SLE  | RRBS | Double negative B cells (DN2) |
| GSE118255 | GSM3323773 | SLE  | RRBS | Resting Naive B cells (rN)    |
| GSE118255 | GSM3323774 | SLE  | RRBS | Switched Memory B cells (SM)  |
| GSE118255 | GSM3323775 | SLE  | RRBS | Transitional 3 B cells (T3)   |
| GSE118255 | GSM3323776 | SLE  | RRBS | Activated Naive B cells (aN)  |
| GSE118255 | GSM3323777 | SLE  | RRBS | Double negative B cells (DN2) |
| GSE118255 | GSM3323779 | SLE  | RRBS | Resting Naive B cells (rN)    |
| GSE118255 | GSM3323780 | SLE  | RRBS | Switched Memory B cells (SM)  |
| GSE118255 | GSM3323781 | SLE  | RRBS | Transitional 3 B cells (T3)   |
| GSE118255 | GSM3323782 | SLE  | RRBS | Activated Naive B cells (aN)  |
| GSE118255 | GSM3323783 | SLE  | RRBS | Double negative B cells (DN2) |
| GSE118255 | GSM3323784 | SLE  | RRBS | Resting Naive B cells (rN)    |

|           |            |     |      |                               |
|-----------|------------|-----|------|-------------------------------|
| GSE118255 | GSM3323785 | SLE | RRBS | Switched Memory B cells (SM)  |
| GSE118255 | GSM3323786 | SLE | RRBS | Transitional 3 B cells (T3)   |
| GSE118255 | GSM3323787 | SLE | RRBS | Activated Naive B cells (aN)  |
| GSE118255 | GSM3323788 | SLE | RRBS | Double negative B cells (DN2) |
| GSE118255 | GSM3323790 | SLE | RRBS | Resting Naive B cells (rN)    |
| GSE118255 | GSM3323791 | SLE | RRBS | Switched Memory B cells (SM)  |
| GSE118255 | GSM3323792 | SLE | RRBS | Transitional 3 B cells (T3)   |
| GSE118255 | GSM3323793 | SLE | RRBS | Activated Naive B cells (aN)  |
| GSE118255 | GSM3323794 | SLE | RRBS | Double negative B cells (DN2) |
| GSE118255 | GSM3323796 | SLE | RRBS | Resting Naive B cells (rN)    |
| GSE118255 | GSM3323797 | SLE | RRBS | Switched Memory B cells (SM)  |
| GSE118255 | GSM3323798 | SLE | RRBS | Transitional 3 B cells (T3)   |
| GSE118255 | GSM3323799 | SLE | RRBS | Activated Naive B cells (aN)  |
| GSE118255 | GSM3323800 | SLE | RRBS | Double negative B cells (DN2) |
| GSE118255 | GSM3323802 | SLE | RRBS | Resting Naive B cells (rN)    |
| GSE118255 | GSM3323803 | SLE | RRBS | Switched Memory B cells (SM)  |
| GSE118255 | GSM3323804 | SLE | RRBS | Transitional 3 B cells (T3)   |



| <b>Primer name</b> | <b>Strand</b> | <b>Sequence</b>       | <b>Purpose</b> |
|--------------------|---------------|-----------------------|----------------|
| GAPDH              | Forward       | TCACCAGGGCTGCTTTTAAC  | RT-qPCR        |
|                    | Reverse       | TGACGGTGCCATGGAATTTG  |                |
| FDFT1              | Forward       | GACCAGCAAGGAGGAAGAGAG | RT-qPCR        |
|                    | Reverse       | CCAAGTCAATATTCTCCGGCT |                |
| BLK                | Forward       | CTTGCTCCAATCAACAAGGC  | RT-qPCR        |
|                    | Reverse       | TAGTGCTTGATCAGCTCCCC  |                |
| rs1047643 allelic  | Forward 1     | TGGAGTTCGTGAAATGCCTT  | Allelic qPCR   |
|                    | Forward 2     | TGGAGTTCGTGAAATGCCTC  |                |
|                    | Reverse       | CAAGCAGGGAGGCTCGG     |                |
| SE5term_8p23       | Forward       | GGATGGATCTGCTGCCTTGT  | ChIP qPCR      |
|                    | Reverse       | GCTGCTGGTGGGTGTTTTTC  |                |
| SE3term_8p23       | Forward       | TGGGGTGTTGAAGGCTGAAA  | ChIP qPCR      |
|                    | Reverse       | CGGTGGGTAAGCAGTGACT   |                |
